# Supplementary material for: Effect of the ring size of TMC ligands in controlling C–H bond activation by metal-superoxo species
Source: Royal Society of Chemistry journal article supplement (doi:10.1039/d2dt00491g), 2022-01-01
Supplement: d2dt00491g1.pdf [file d2dt00491g1.pdf]

## **Effect of Ring Size of TMC Ligands in Controlling C-H Bond Reactivity by Metal-Superoxo Species**

Monika and Azaj Ansari\*

*Department of Chemistry, Central University of Haryana, Mahendergarh 123031, India.*

*Email: [ajaz.alam2@gmail.com](mailto:ajaz.alam2@gmail.com)*

(a)

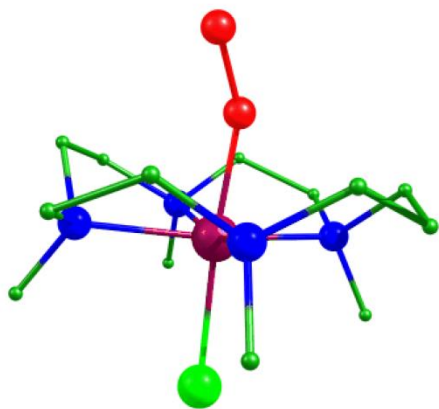

(b)

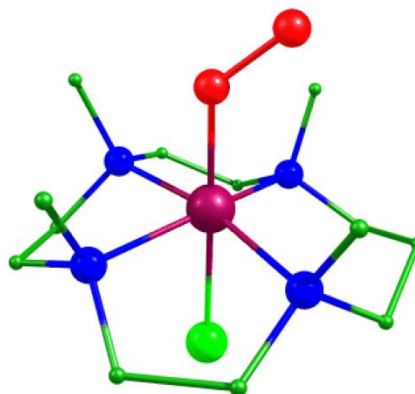

**Fig. S1** B3LYP-D2 optimized structures of a) Isomer A and b) Isomer B.

**Table S1.** B3LYP-D2 computed relative energy ( $\Delta G$  in  $\text{kJ mol}^{-1}$ ) for species I to IV with both the isomers A and B.

| Spin state                                               | 13-TMC | 14-TMC                             |       |
|----------------------------------------------------------|--------|------------------------------------|-------|
| <b>([V(13/14-TMC)O<sub>2</sub>Cl]<sup>+</sup>, I)</b>    |        |                                    |       |
| <sup>4</sup> IA <sub>a</sub> -hs                         | 43.6   | <sup>4</sup> IA <sub>b</sub> -hs   | 51.5  |
| <sup>2</sup> IA <sub>a</sub> -hs                         | 0      | <sup>2</sup> IA <sub>b</sub> -hs   | 0     |
| <sup>4</sup> IB <sub>a</sub> -hs                         | 62.1   | <sup>4</sup> IB <sub>b</sub> -hs   | 67.1  |
| <sup>2</sup> IB <sub>a</sub> -hs                         | 10.6   | <sup>2</sup> IB <sub>b</sub> -hs   | 14.7  |
| <b>([Cr(13/14-TMC)O<sub>2</sub>Cl]<sup>+</sup>, II)</b>  |        |                                    |       |
| <sup>5</sup> IIA <sub>a</sub> -hs                        | 13.1   | <sup>5</sup> IIA <sub>b</sub> -hs  | 16.5  |
| <sup>3</sup> IIA <sub>a</sub> -hs                        | 0      | <sup>3</sup> IIA <sub>b</sub> -hs  | 0     |
| <sup>3</sup> IIA <sub>a</sub> -ls                        | 3.9    | <sup>3</sup> IIA <sub>b</sub> -ls  | 4.1   |
| <sup>1</sup> IIA <sub>a</sub> -ls                        | 274.1  | <sup>1</sup> IIA <sub>b</sub> -ls  | 264.4 |
| <sup>5</sup> IIB <sub>a</sub> -hs                        | 28.9   | <sup>5</sup> IIB <sub>b</sub> -hs  | 24.9  |
| <sup>3</sup> IIB <sub>a</sub> -hs                        | 6.6    | <sup>3</sup> IIB <sub>b</sub> -hs  | 5.5   |
| <sup>3</sup> IIB <sub>a</sub> -ls                        | 13.7   | <sup>3</sup> IIB <sub>b</sub> -ls  | 7.8   |
| <sup>1</sup> IIB <sub>a</sub> -ls                        | 273.4  | <sup>1</sup> IIB <sub>b</sub> -ls  | 265.5 |
| <b>([Mn(13/14-TMC)O<sub>2</sub>Cl]<sup>+</sup>, III)</b> |        |                                    |       |
| <sup>6</sup> IIIA <sub>a</sub> -hs                       | 0      | <sup>6</sup> IIIA <sub>b</sub> -hs | 26.4  |
| <sup>4</sup> IIIA <sub>a</sub> -hs                       | 17.2   | <sup>4</sup> IIIA <sub>b</sub> -hs | 0     |
| <sup>4</sup> IIIA <sub>a</sub> -is                       | 26.5   | <sup>4</sup> IIIA <sub>b</sub> -is | 86.0  |
| <sup>2</sup> IIIA <sub>a</sub> -is                       | 35.3   | <sup>2</sup> IIIA <sub>b</sub> -is | 60.9  |
| <sup>2</sup> IIIA <sub>a</sub> -ls                       | 35.2   | <sup>2</sup> IIIA <sub>b</sub> -ls | 63.1  |
| <sup>6</sup> IIIB <sub>a</sub> -hs                       | 15.6   | <sup>6</sup> IIIB <sub>b</sub> -hs | 28.6  |
| <sup>4</sup> IIIB <sub>a</sub> -hs                       | 30.9   | <sup>4</sup> IIIB <sub>b</sub> -hs | 3.5   |
| <sup>4</sup> IIIB <sub>a</sub> -is                       | 61.8   | <sup>4</sup> IIIB <sub>b</sub> -is | 93.9  |
| <sup>2</sup> IIIB <sub>a</sub> -is                       | 40.4   | <sup>2</sup> IIIB <sub>b</sub> -is | 65.1  |
| <sup>2</sup> IIIB <sub>a</sub> -ls                       | 142.5  | <sup>2</sup> IIIB <sub>b</sub> -ls | 65.0  |
| <b>([Fe(13/14-TMC)O<sub>2</sub>Cl]<sup>+</sup>, IV)</b>  |        |                                    |       |
| <sup>7</sup> IVA <sub>a</sub> -hs                        | 0      | <sup>7</sup> IVA <sub>b</sub> -hs  | 0     |
| <sup>5</sup> IVA <sub>a</sub> -hs                        | 20.2   | <sup>5</sup> IVA <sub>b</sub> -hs  | 6.8   |
| <sup>5</sup> IVA <sub>a</sub> -is                        | 37.5   | <sup>5</sup> IVA <sub>b</sub> -is  | 38.8  |
| <sup>3</sup> IVA <sub>a</sub> -is                        | 96.4   | <sup>3</sup> IVA <sub>b</sub> -is  | 71.7  |
| <sup>3</sup> IVA <sub>a</sub> -ls                        | 54.4   | <sup>3</sup> IVA <sub>b</sub> -ls  | 43.9  |
| <sup>1</sup> IVA <sub>a</sub> -ls                        | 145.6  | <sup>1</sup> IVA <sub>b</sub> -ls  | 135.1 |
| <sup>7</sup> IVB <sub>a</sub> -hs                        | 27.6   | <sup>7</sup> IVB <sub>b</sub> -hs  | 8.2   |
| <sup>5</sup> IVB <sub>a</sub> -hs                        | 27.6   | <sup>5</sup> IVB <sub>b</sub> -hs  | 18.8  |
| <sup>5</sup> IVB <sub>a</sub> -is                        | 40.7   | <sup>5</sup> IVB <sub>b</sub> -is  | 75.4  |
| <sup>3</sup> IVB <sub>a</sub> -is                        | 62.7   | <sup>3</sup> IVB <sub>b</sub> -is  | 56.7  |
| <sup>3</sup> IVB <sub>a</sub> -ls                        | 48.9   | <sup>3</sup> IVB <sub>b</sub> -ls  | 131.9 |
| <sup>1</sup> IVB <sub>a</sub> -ls                        | 136.2  | <sup>1</sup> IVB <sub>b</sub> -ls  | 132.0 |

**Table S2.** B3LYP-D2 computed formation energies of species I to V with ground state.

| Formation energy(kJ/mol)       |        |         |
|--------------------------------|--------|---------|
| Spin State                     | 13-TMC | 14-TMC  |
| $^2\text{I}_{\text{hs}}$       | -727.4 | -725.5  |
| $^3\text{II}_{\text{hs}}$      | -688.2 | -670.7  |
| $^{6/4}\text{III}_{\text{hs}}$ | -586.9 | -646.0  |
| $^7\text{IV}_{\text{hs}}$      | -652.9 | -642.7  |
| $^2\text{V}_{\text{ls}}$       | -686.1 | -1515.1 |

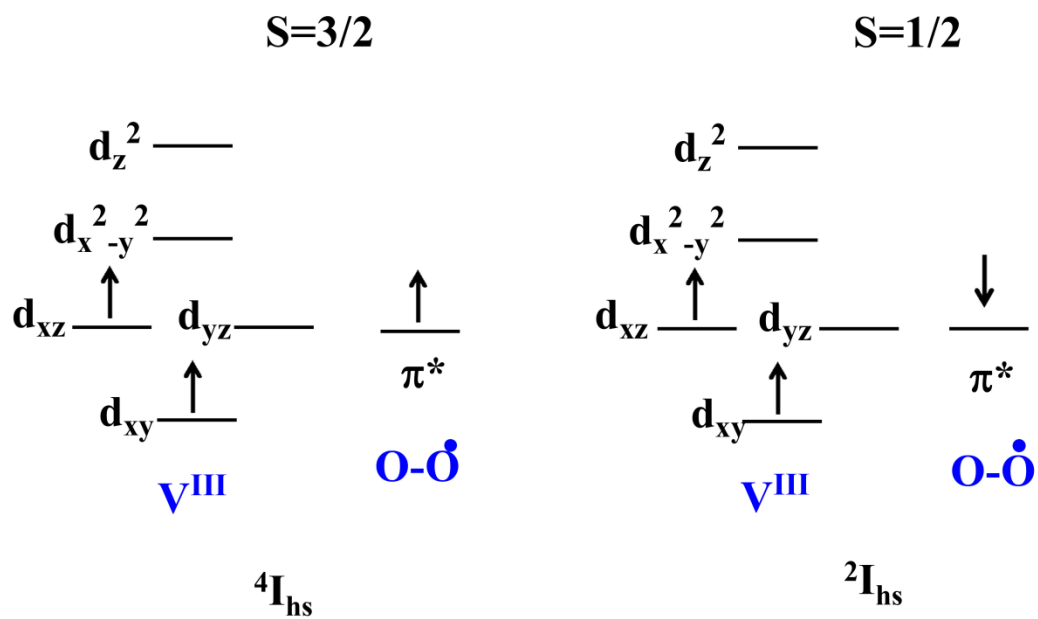

**Scheme S1.** A model structure of vanadium-superoxo species with existence of quartet, and doublet spin states.

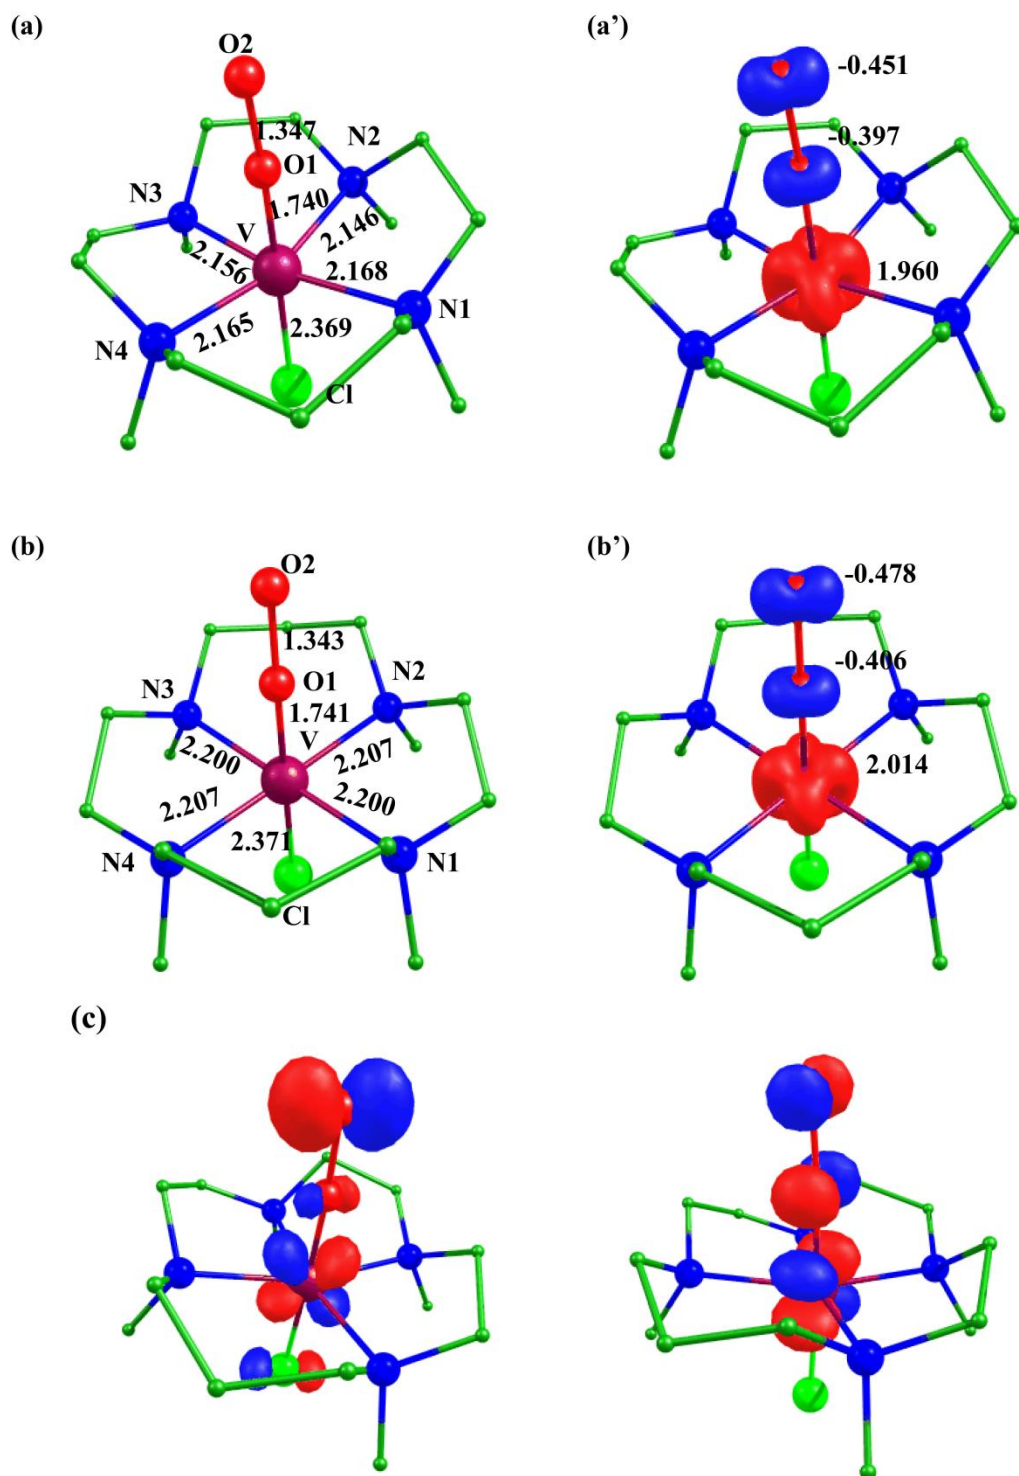

**Fig. S2** B3LYP-D2 a) Optimized structure (bond lengths in Å), a') corresponding spin density plot of  ${}^2I_{a-hs}$ , b) optimized structure (bond lengths in Å), b') corresponding spin density plot of  ${}^2I_{b-hs}$ , and c)  $d_{yz/xz}$  orbitals.

**Table S3.** B3LYP-D2 computed selective structural parameters of metal-superoxo species, intermediates, transition states and product with 13-TMC ligand.

| Spin State                                 | Bond length (Å) |       |       |       |       |       |       |                    | Bond angle (°) |       |       |       |       |         |          |          |         |         |
|--------------------------------------------|-----------------|-------|-------|-------|-------|-------|-------|--------------------|----------------|-------|-------|-------|-------|---------|----------|----------|---------|---------|
|                                            | M-O1            | O1-O2 | M-Cl  | M-N1  | M-N2  | M-N3  | M-N4  | M-N <sub>avg</sub> | O2-H1          | O2-H2 | C-H   | O2-C2 | MO1O2 | O1-M-Cl | O2-H1-C1 | O2-H2-C2 | N4-M-N5 | N6-M-N7 |
| [V(13-TMC)O <sub>2</sub> Cl] <sup>+</sup>  |                 |       |       |       |       |       |       |                    |                |       |       |       |       |         |          |          |         |         |
| <sup>4</sup> I <sub>a</sub> -hs            | 1.939           | 1.369 | 2.378 | 2.178 | 2.145 | 2.149 | 2.150 | 2.155              | -              | -     | -     | -     | 141.1 | 174.9   | -        | -        | 167.9   | 162.1   |
| <sup>2</sup> I <sub>a</sub> -hs            | 1.740           | 1.347 | 2.369 | 2.168 | 2.146 | 2.156 | 2.165 | 2.159              | -              | -     | -     | -     | 176.4 | 176.3   | -        | -        | 167.9   | 164.4   |
| <sup>4</sup> I <sub>a</sub> -hs-ts1        | 1.871           | 1.445 | 2.416 | 2.150 | 2.183 | 2.155 | 2.149 | 2.159              | 1.407          | -     | 1.221 | -     | 136.2 | 173.8   | 175.1    | -        | 165.2   | 167.8   |
| <sup>2</sup> I <sub>a</sub> -hs-ts1        | 1.867           | 1.438 | 2.415 | 2.152 | 2.179 | 2.155 | 2.153 | 2.159              | 1.364          | -     | 1.246 | -     | 138.9 | 174.9   | 177.2    | -        | 167.9   | 165.0   |
| <sup>4</sup> I <sub>a</sub> -hs-Int        | 1.874           | 1.516 | 2.411 | 2.146 | 2.186 | 2.155 | 2.143 | 2.157              | -              | -     | -     | -     | 132.8 | 172.6   | -        | -        | 166.2   | 167.9   |
| <sup>2</sup> I <sub>als</sub> -Int         | 1.648           | 1.977 | 2.437 | 2.134 | 2.109 | 2.164 | 2.165 | 2.143              | -              | -     | -     | -     | 131.1 | 131.1   | -        | -        | 161.2   | 162.2   |
| <sup>4</sup> I <sub>a</sub> -hs-ts2        | 1.781           | 1.896 | 2.461 | 2.180 | 2.170 | 2.125 | 2.154 | 2.157              | -              | 1.546 | -     | 1.190 | 135.9 | 173.5   | -        | 175.7    | 165.9   | 169.5   |
| <sup>2</sup> I <sub>a</sub> -P             | 1.621           | -     | 2.451 | 2.162 | 2.162 | 2.139 | 2.148 | 2.153              | -              | -     | -     | -     | -     | 175.7   | -        | -        | 166.7   | 168.2   |
| Ref <sup>1</sup>                           | 1.568           | -     | -     | -     | -     | -     | -     | -                  | -              | -     | -     | -     | -     | -       | -        | -        | -       | -       |
| [Cr(13-TMC)O <sub>2</sub> Cl] <sup>+</sup> |                 |       |       |       |       |       |       |                    |                |       |       |       |       |         |          |          |         |         |
| <sup>5</sup> II <sub>a</sub> -hs           | 2.039           | 1.372 | 2.380 | 2.154 | 2.106 | 2.115 | 2.123 | 2.124              | -              | -     | -     | -     | 133.9 | 171.8   | -        | -        | 168.7   | 163.4   |
| <sup>3</sup> II <sub>a</sub> -hs           | 1.975           | 1.365 | 2.386 | 2.155 | 2.112 | 2.116 | 2.127 | 2.127              | -              | -     | -     | -     | 135.6 | 171.5   | -        | -        | 168.6   | 164.4   |
| <sup>3</sup> II <sub>a</sub> -ls           | 1.906           | 1.366 | 2.366 | 2.153 | 2.112 | 2.114 | 2.125 | 2.126              | -              | -     | -     | -     | 139.8 | 172.4   | -        | -        | 168.5   | 164.6   |
| <sup>1</sup> II <sub>a</sub> -ls           | 1.925           | 1.364 | 2.368 | 2.153 | 2.109 | 2.115 | 2.127 | 2.126              | -              | -     | -     | -     | 140.2 | 172.3   | -        | -        | 168.6   | 164.5   |
| <sup>5</sup> II <sub>a</sub> -hs-ts1       | 1.951           | 1.452 | 2.404 | 2.122 | 2.155 | 2.110 | 2.112 | 2.125              | 1.343          | -     | 1.252 | -     | 131.4 | 173.1   | 175.6    | -        | 165.5   | 169.3   |
| <sup>3</sup> II <sub>a</sub> -hs-ts1       | 1.946           | 1.447 | 2.407 | 2.130 | 2.155 | 2.111 | 2.111 | 2.127              | 1.298          | -     | 1.289 | -     | 132.0 | 171.0   | 173.8    | -        | 166.0   | 168.8   |
| <sup>3</sup> II <sub>a</sub> -ls-ts1       | 1.906           | 1.446 | 2.390 | 2.130 | 2.156 | 2.111 | 2.110 | 2.127              | 1.309          | -     | 1.280 | -     | 134.0 | 171.7   | 175.1    | -        | 165.9   | 168.8   |
| <sup>1</sup> II <sub>a</sub> -ls-ts1       | 1.906           | 1.446 | 2.390 | 2.130 | 2.156 | 2.111 | 2.110 | 2.127              | 1.345          | -     | 1.258 | -     | 134.0 | 171.7   | -        | -        | 165.9   | 168.8   |
| <sup>5</sup> II <sub>a</sub> -hs-Int       | 1.739           | 2.179 | 2.397 | 2.160 | 2.122 | 2.111 | 2.115 | 2.127              | -              | -     | -     | -     | 136.8 | 174.2   | -        | -        | 166.3   | 168.5   |
| <sup>3</sup> II <sub>a</sub> -ls-Int       | 1.918           | 1.518 | 2.384 | 2.109 | 2.113 | 2.154 | 2.119 | 2.124              | -              | -     | -     | -     | 129.7 | 173.1   | -        | -        | 168.6   | 166.5   |
| <sup>5</sup> II <sub>a</sub> -hs-ts2       | 1.941           | 1.749 | 2.423 | 2.127 | 2.139 | 2.146 | 2.087 | 2.125              | -              | 1.557 | -     | 1.192 | 131.5 | 172.8   | -        | 177.6    | 164.7   | 170.5   |
| <sup>3</sup> II <sub>a</sub> -ls-ts2       | 1.851           | 1.668 | 2.414 | 2.151 | 2.152 | 2.086 | 2.122 | 2.128              | -              | 1.766 | -     | 1.144 | 131.5 | 169.9   | -        | 1.766    | 166.2   | 170.1   |

|                                            |       |       |       |       |       |       |       |       |       |       |       |       |       |       |       |       |       |       |
|--------------------------------------------|-------|-------|-------|-------|-------|-------|-------|-------|-------|-------|-------|-------|-------|-------|-------|-------|-------|-------|
| <sup>3</sup> II <sub>a</sub> -hs-P         | 1.720 | -     | 2.419 | 2.137 | 2.134 | 2.118 | 2.123 | 2.128 | -     | -     | -     | -     | -     | 177.0 | -     | -     | 165.1 | 168.8 |
| <sup>1</sup> II <sub>a</sub> -ls-P         | 1.584 | -     | 2.392 | 2.151 | 2.151 | 2.105 | 2.117 | 2.131 | -     | -     | -     | -     | -     | 176.1 | -     | -     | 168.0 | 170.4 |
| [Mn(13-TMC)O <sub>2</sub> Cl] <sup>+</sup> |       |       |       |       |       |       |       |       |       |       |       |       |       |       |       |       |       |       |
| <sup>6</sup> III <sub>a</sub> -hs          | 2.284 | 1.379 | 2.482 | 2.137 | 2.075 | 2.114 | 2.096 | 2.105 | -     | -     | -     | -     | 133.7 | 175.2 | -     | -     | 168.9 | 159.6 |
| <sup>4</sup> III <sub>a</sub> -hs          | 2.078 | 1.323 | 2.352 | 2.231 | 2.202 | 2.237 | 2.161 | 2.208 | -     | -     | -     | -     | 133.8 | 170.7 | -     | -     | 163.7 | 158.6 |
| <sup>4</sup> III <sub>a</sub> -is          | 1.967 | 1.365 | 2.336 | 2.136 | 2.073 | 2.082 | 2.102 | 2.098 | -     | -     | -     | -     | 135.2 | 170.9 | -     | -     | 169.9 | 163.8 |
| <sup>2</sup> III <sub>a</sub> -is          | 1.910 | 1.359 | 2.327 | 2.135 | 2.074 | 2.085 | 2.103 | 2.099 | -     | -     | -     | -     | 138.9 | 173.3 | -     | -     | 170.7 | 164.8 |
| <sup>2</sup> III <sub>a</sub> -ls          | 1.909 | 1.359 | 2.326 | 2.135 | 2.074 | 2.085 | 2.103 | 2.099 | -     | -     | -     | -     | 138.9 | 173.3 | -     | -     | 170.7 | 164.8 |
| <sup>6</sup> III <sub>a</sub> -hs-ts1      | 1.931 | 1.434 | 2.344 | 2.238 | 2.146 | 2.241 | 2.183 | 2.202 | 1.358 | -     | 1.251 | -     | 131.6 | 170.5 | 172.8 | -     | 165.1 | 162.5 |
| <sup>4</sup> III <sub>a</sub> -hs-ts1      | 1.938 | 1.426 | 2.348 | 2.193 | 2.232 | 2.167 | 2.230 | 2.205 | 1.305 | -     | 1.296 | -     | 131.9 | 169.1 | 168.5 | -     | 162.3 | 165.0 |
| <sup>4</sup> III <sub>a</sub> -is-ts1      | 1.901 | 1.449 | 2.353 | 2.095 | 2.139 | 2.075 | 2.079 | 2.097 | 1.360 | -     | 1.244 | -     | 132.0 | 173.3 | 175.7 | -     | 166.1 | 171.1 |
| <sup>2</sup> III <sub>a</sub> -is-ts1      | 1.897 | 1.443 | 2.357 | 2.106 | 2.140 | 2.075 | 2.078 | 2.099 | 1.315 | -     | 1.279 | -     | 132.5 | 171.3 | 173.3 | -     | 166.9 | 170.5 |
| <sup>2</sup> III <sub>a</sub> -ls-ts1      | 1.886 | 1.446 | 2.358 | 2.105 | 2.142 | 2.075 | 2.078 | 2.100 | 1.330 | -     | 1.266 | -     | 132.9 | 171.7 | 175.0 | -     | 166.7 | 170.5 |
| <sup>6</sup> III <sub>a</sub> -hs-Int      | 2.092 | 1.521 | 2.493 | 2.191 | 2.066 | 2.159 | 2.069 | 2.121 | -     | -     | -     | -     | 129.3 | 174.6 | -     | -     | 168.6 | 164.8 |
| <sup>4</sup> III <sub>a</sub> -is-Int      | 1.904 | 1.524 | 2.358 | 2.079 | 2.133 | 2.083 | 2.082 | 2.094 | -     | -     | -     | -     | 127.7 | 172.6 | -     | -     | 170.2 | 167.0 |
| <sup>2</sup> III <sub>a</sub> -ls-Int      | 2.256 | 1.320 | 2.482 | 2.137 | 2.075 | 2.113 | 2.096 | 2.105 | -     | -     | -     | -     | 141.1 | 170.8 | -     | -     | 168.9 | 159.5 |
| <sup>4</sup> III <sub>a</sub> -is-ts2      | 1.811 | 1.747 | 2.399 | 2.088 | 2.126 | 2.130 | 2.051 | 2.099 | -     | 1.728 | -     | 1.150 | 130.2 | 169.2 | -     | 172.3 | 166.7 | 170.9 |
| <sup>2</sup> III <sub>a</sub> -ls-ts2      | 1.839 | 1.653 | 2.371 | 2.090 | 2.133 | 2.137 | 2.050 | 2.102 | -     | 1.765 | -     | 1.145 | 132.1 | 170.5 | -     | 173.5 | 166.8 | 171.9 |
| <sup>4</sup> III <sub>a</sub> -hs-P        | 1.686 | -     | 2.415 | 2.103 | 2.109 | 2.085 | 2.099 | 2.099 | -     | -     | -     | -     | -     | 177.1 | -     | -     | 166.0 | 169.0 |
| <sup>2</sup> III <sub>a</sub> -ls-P        | 1.640 | -     | 2.377 | 2.114 | 2.115 | 2.081 | 2.092 | 2.100 | -     | -     | -     | -     | -     | 176.6 | -     | -     | 166.7 | 170.2 |
| [Fe(13-TMC)O <sub>2</sub> Cl] <sup>+</sup> |       |       |       |       |       |       |       |       |       |       |       |       |       |       |       |       |       |       |
| <sup>7</sup> IV <sub>a</sub> -hs           | 2.145 | 1.322 | 2.364 | 2.181 | 2.172 | 2.209 | 2.163 | 2.181 | -     | -     | -     | -     | 155.5 | 176.4 | -     | -     | 163.3 | 154.3 |
| <sup>5</sup> IV <sub>a</sub> -hs           | 1.983 | 1.349 | 2.352 | 2.181 | 2.158 | 2.186 | 2.186 | 2.178 | -     | -     | -     | -     | 147.5 | 176.6 | -     | -     | 164.1 | 158.2 |
| <sup>5</sup> IV <sub>a</sub> -is           | 2.283 | 1.359 | 2.443 | 2.111 | 2.046 | 2.078 | 2.085 | 2.080 | -     | -     | -     | -     | 134.8 | 175.3 | -     | -     | 158.5 | 170.3 |
| <sup>3</sup> IV <sub>a</sub> -is           | 2.175 | 1.369 | 2.435 | 2.125 | 2.048 | 2.087 | 2.084 | 2.086 | -     | -     | -     | -     | 136.0 | 175.1 | -     | -     | 170.8 | 160.7 |
| <sup>3</sup> IV <sub>a</sub> -ls           | 1.988 | 1.363 | 2.338 | 2.114 | 2.053 | 2.059 | 2.076 | 2.075 | -     | -     | -     | -     | 131.2 | 169.6 | -     | -     | 170.4 | 165.4 |
| <sup>1</sup> IV <sub>a</sub> -ls           | 1.956 | 1.356 | 2.345 | 2.061 | 2.053 | 2.112 | 2.073 | 2.075 | -     | -     | -     | -     | 131.8 | 171.7 | -     | -     | 166.1 | 171.1 |
| <sup>7</sup> IV <sub>a</sub> -hs-ts1       | 1.970 | 1.417 | 2.390 | 2.183 | 2.194 | 2.201 | 2.167 | 2.186 | 1.341 | -     | 1.263 | -     | 143.8 | 175.9 | 178.5 | -     | 164.3 | 160.3 |
| <sup>5</sup> IV <sub>a</sub> -hs-ts1       | 1.941 | 1.421 | 2.385 | 2.198 | 2.165 | 2.182 | 2.194 | 2.185 | 1.334 | -     | 1.263 | -     | 142.0 | 175.5 | 177.6 | -     | 160.7 | 164.4 |
| <sup>5</sup> IV <sub>a</sub> -is-ts1       | 1.950 | 1.426 | 2.349 | 2.145 | 2.188 | 2.150 | 2.209 | 2.173 | 1.358 | -     | 1.251 | -     | 129.3 | 169.2 | 170.9 | -     | 163.0 | 165.5 |
| <sup>3</sup> IV <sub>a</sub> -is-ts1       | 1.966 | 1.417 | 2.364 | 2.154 | 2.184 | 2.157 | 2.204 | 2.175 | 1.295 | -     | 1.305 | -     | 130.3 | 168.7 | 169.2 | -     | 165.6 | 163.0 |





**Table S4.** B3LYP-D2 computed selective structural parameters of metal-superoxo species, intermediates, transition states and product with 14-TMC ligand.

| Spin State                                 | Bond Length (Å) |       |       |       |       |       |       |                    | Bond Angel (°) |       |       |       |       |         |          |          |         |         |
|--------------------------------------------|-----------------|-------|-------|-------|-------|-------|-------|--------------------|----------------|-------|-------|-------|-------|---------|----------|----------|---------|---------|
|                                            | M-O1            | O1-O2 | M-Cl  | M-N1  | M-N2  | M-N3  | M-N4  | M-N <sub>avg</sub> | O2-H1          | O2-H2 | H1-C1 | H2-C1 | MO1O2 | O1-M-Cl | O2-H1-C1 | O2-H2-C2 | N1-M-N2 | N3-M-N4 |
| [V(14-TMC)O <sub>2</sub> Cl] <sup>+</sup>  |                 |       |       |       |       |       |       |                    |                |       |       |       |       |         |          |          |         |         |
| <sup>4</sup> I <sub>b-hs</sub>             | 1.911           | 1.370 | 2.382 | 2.207 | 2.188 | 2.197 | 2.215 | 2.202              | -              | -     | -     | -     | 140.0 | 174.3   | -        | -        | 173.1   | 172.7   |
| <sup>2</sup> I <sub>b-hs</sub>             | 1.741           | 1.343 | 2.371 | 2.200 | 2.207 | 2.200 | 2.207 | 2.203              | -              | -     | -     | -     | 173.7 | 176.1   | -        | -        | 173.9   | 173.9   |
| <sup>4</sup> I <sub>b-hs</sub> -ts1        | 1.858           | 1.445 | 2.419 | 2.193 | 2.225 | 2.213 | 2.184 | 2.196              | 1.407          | -     | 1.216 | -     | 135.3 | 173.4   | 176.2    | -        | 174.4   | 174.6   |
| <sup>2</sup> I <sub>b-hs</sub> -ts1        | 1.856           | 1.439 | 2.418 | 2.225 | 2.209 | 2.186 | 2.196 | 2.204              | 1.364          | -     | 1.239 | -     | 137.5 | 174.6   | 178.1    | -        | 174.4   | 174.5   |
| <sup>4</sup> I <sub>b-hs</sub> -Int        | 1.859           | 1.515 | 2.412 | 2.180 | 2.217 | 2.223 | 2.192 | 2.203              | -              | -     | -     | -     | 132.3 | 172.3   | -        | -        | 175.4   | 175.0   |
| <sup>2</sup> I <sub>b-ls</sub> -Int        | 1.655           | 1.912 | 2.443 | 2.132 | 2.216 | 2.219 | 2.156 | 2.181              | -              | -     | -     | -     | 129.7 | 169.1   | -        | -        | 176.6   | 174.4   |
| <sup>4</sup> I <sub>b-hs</sub> -ts2        | 1.733           | 2.074 | 2.464 | 2.221 | 2.196 | 2.204 | 2.222 | 2.211              | -              | 1.550 | -     | 1.211 | 148.6 | 178.2   | -        | 173.3    | 176.2   | 175.7   |
| <sup>2</sup> I <sub>b-hs</sub> -P          | 1.616           | -     | 2.451 | 2.193 | 2.204 | 2.192 | 2.205 | 2.198              | -              | -     | -     | -     | -     | 176.7   | -        | -        | 176.2   | 176.2   |
| [Cr(14-TMC)O <sub>2</sub> Cl] <sup>+</sup> |                 |       |       |       |       |       |       |                    |                |       |       |       |       |         |          |          |         |         |
| <sup>5</sup> II <sub>b-hs</sub>            | 2.021           | 1.371 | 2.382 | 2.179 | 2.167 | 2.152 | 2.177 | 2.169              | -              | -     | -     | -     | 132.4 | 172.3   | -        | -        | 173.3   | 172.9   |
| <sup>3</sup> II <sub>b-hs</sub>            | 1.958           | 1.363 | 2.388 | 2.183 | 2.167 | 2.154 | 2.182 | 2.171              | -              | -     | -     | -     | 134.7 | 172.4   | -        | -        | 173.8   | 173.6   |
| <sup>3</sup> II <sub>b-ls</sub>            | 1.889           | 1.365 | 2.368 | 2.180 | 2.167 | 2.154 | 2.183 | 2.171              | -              | -     | -     | -     | 139.2 | 173.2   | -        | -        | 174.2   | 174.0   |
| <sup>1</sup> II <sub>b-ls</sub>            | 1.909           | 1.363 | 2.368 | 2.180 | 2.155 | 2.165 | 2.177 | 2.169              | -              | -     | -     | -     | 139.7 | 173.4   | -        | -        | 174.0   | 173.8   |
| Exp. <sup>4</sup>                          | 1.876           | 1.231 | 2.316 | -     | -     | -     | -     | -                  | -              | -     | -     | -     | 146.3 | 174.5   | -        | -        | -       | -       |
| <sup>5</sup> II <sub>b-hs</sub> -ts1       | 1.937           | 1.451 | 2.406 | 2.186 | 2.151 | 2.161 | 2.189 | 2.172              | 1.343          | -     | 1.250 | -     | 130.7 | 172.3   | 172.7    | -        | 174.2   | 174.3   |
| <sup>3</sup> II <sub>b-hs</sub> -ts1       | 1.930           | 1.447 | 2.409 | 2.189 | 2.157 | 2.168 | 2.181 | 2.174              | 1.298          | -     | 1.286 | -     | 131.9 | 170.9   | 170.0    | -        | 174.8   | 174.7   |
| <sup>3</sup> II <sub>b-ls</sub> -ts1       | 1.914           | 1.449 | 2.390 | 2.150 | 2.159 | 2.187 | 2.181 | 2.169              | 1.309          | -     | 1.247 | -     | 133.1 | 173.1   | 173.9    | -        | 174.2   | 174.3   |
| <sup>1</sup> II <sub>b-ls</sub> -ts1       | 1.888           | 1.447 | 2.390 | 2.184 | 2.151 | 2.162 | 2.187 | 2.171              | 1.345          | -     | 1.258 | -     | 134.2 | 173.1   | -        | -        | 174.6   | 174.8   |
| <sup>5</sup> II <sub>b-hs</sub> -Int       | 1.943           | 1.516 | 2.397 | 2.147 | 2.183 | 2.196 | 2.161 | 2.172              | -              | -     | -     | -     | 127.5 | 172.0   | -        | -        | 175.1   | 174.6   |
| <sup>3</sup> II <sub>b-ls</sub> -Int       | 1.894           | 1.518 | 2.386 | 2.161 | 2.144 | 2.185 | 2.196 | 2.171              | -              | -     | -     | -     | 129.2 | 171.8   | -        | -        | 175.3   | 174.9   |
| <sup>5</sup> II <sub>b-hs</sub> -ts2       | 1.911           | 1.754 | 2.431 | 2.159 | 2.159 | 2.202 | 2.202 | 2.180              | -              | 1.561 | -     | 1.194 | 127.2 | 176.7   | -        | 179.6    | 174.5   | 174.5   |
| <sup>3</sup> II <sub>b-ls</sub> -ts2       | 1.867           | 1.706 | 2.432 | 2.156 | 2.155 | 2.208 | 2.208 | 2.182              | -              | 1.683 | -     | 1.163 | 125.6 | 175.1   | -        | 179.0    | 175.1   | 175.1   |

|                                            |       |       |       |       |       |       |       |       |       |       |       |       |       |       |       |       |       |        |
|--------------------------------------------|-------|-------|-------|-------|-------|-------|-------|-------|-------|-------|-------|-------|-------|-------|-------|-------|-------|--------|
| <sup>3</sup> II <sub>b-hs</sub> -P         | 1.715 | -     | 2.419 | 2.167 | 2.167 | 2.176 | 2.176 | 2.171 | -     | -     | -     | -     | -     | 176.8 | -     | -     | 174.5 | 174.5  |
| <sup>1</sup> II <sub>b-ls</sub> -P         | 1.580 | -     | 2.387 | 2.176 | 2.182 | 2.175 | 2.182 | 2.179 | -     | -     | -     | -     | -     | 176.9 | -     | -     | 176.6 | 176.6  |
| Exp. <sup>5</sup>                          | 1.698 | -     | 2.383 |       |       |       |       |       |       |       |       |       |       | 176.8 |       |       |       |        |
| [Mn(14-TMC)O <sub>2</sub> Cl] <sup>+</sup> |       |       |       |       |       |       |       |       |       |       |       |       |       |       |       |       |       |        |
| <sup>6</sup> III <sub>b-hs</sub>           | 2.107 | 1.355 | 2.393 | 2.289 | 2.292 | 2.122 | 2.151 | 2.213 | -     | -     | -     | -     | 133.2 | 171.8 | -     | -     | 170.5 | 170.2  |
| <sup>4</sup> III <sub>b-hs</sub>           | 2.043 | 1.322 | 2.354 | 2.254 | 2.273 | 2.217 | 2.268 | 2.253 | -     | -     | -     | -     | 133.1 | 171.4 | -     | -     | 169.6 | 170.0  |
| <sup>4</sup> III <sub>b-is</sub>           | 1.966 | 1.365 | 2.331 | 2.162 | 2.137 | 2.129 | 2.153 | 2.145 | -     | -     | -     | -     | 132.8 | 171.7 | -     | -     | 173.7 | 173.1  |
| <sup>2</sup> III <sub>b-is</sub>           | 1.918 | 1.357 | 2.333 | 2.158 | 2.161 | 2.132 | 2.139 | 2.147 | -     | -     | -     | -     | 134.5 | 172.4 | -     | -     | 173.8 | 174.1  |
| <sup>2</sup> III <sub>b-ls</sub>           | 1.884 | 1.357 | 2.328 | 2.157 | 2.141 | 2.134 | 2.158 | 2.079 | -     | -     | -     | -     | 139.2 | 173.8 | -     | -     | 174.2 | 174.01 |
| <sup>6</sup> III <sub>b-hs</sub> -ts1      | 1.922 | 1.430 | 2.346 | 2.257 | 2.265 | 2.268 | 2.219 | 2.252 | 1.358 | -     | 1.242 | -     | 130.6 | 171.3 | 169.6 | -     | 172.7 | 172.8  |
| <sup>4</sup> III <sub>b-hs</sub> -ts1      | 1.928 | 1.423 | 2.353 | 2.257 | 2.253 | 2.276 | 2.230 | 2.254 | 1.305 | -     | 1.296 | -     | 131.3 | 169.6 | 167.2 | -     | 173.1 | 173.2  |
| <sup>4</sup> III <sub>b-is</sub> -ts1      | 1.886 | 1.447 | 2.348 | 2.166 | 2.134 | 2.128 | 2.166 | 2.148 | 1.360 | -     | 1.240 | -     | 131.2 | 172.5 | 169.7 | -     | 174.8 | 174.8  |
| <sup>2</sup> III <sub>b-is</sub> -ts1      | 1.881 | 1.442 | 2.354 | 2.140 | 2.157 | 2.169 | 2.133 | 2.149 | 1.315 | -     | 1.275 | -     | 132.4 | 171.2 | 169.3 | -     | 175.2 | 175.1  |
| <sup>2</sup> III <sub>b-ls</sub> -ts1      | 1.869 | 1.444 | 2.355 | 2.136 | 2.158 | 2.169 | 2.134 | 2.149 | 1.330 | -     | 1.262 | -     | 133.3 | 171.6 | 170.9 | -     | 175.1 | 175.2  |
| <sup>6</sup> III <sub>a-hs</sub> -Int      | 1.916 | 1.511 | 2.344 | 2.132 | 2.318 | 2.179 | 2.313 | 2.235 | -     | -     | -     | -     | 127.8 | 169.9 | -     | -     | 173.7 | 173.7  |
| <sup>4</sup> III <sub>a-is</sub> -Int      | 1.885 | 1.519 | 2.351 | 2.117 | 2.162 | 2.175 | 2.130 | 2.146 | -     | -     | -     | -     | 127.1 | 171.2 | -     | -     | 175.8 | 175.3  |
| <sup>2</sup> III <sub>a-ls</sub> -Int      | 1.767 | 1.537 | 2.343 | 2.128 | 2.173 | 2.184 | 2.135 | 2.155 | -     | -     | -     | -     | 130.1 | 170.8 | -     | -     | 176.7 | 176.3  |
| <sup>4</sup> III <sub>b-is</sub> -ts2      | 1.839 | 1.654 | 2.341 | 2.304 | 2.209 | 2.304 | 2.184 | 2.250 | -     | 1.769 | -     | 1.146 | 130.8 | 168.6 | -     | 173.6 | 174.8 | 173.6  |
| <sup>2</sup> III <sub>b-ls</sub> -ts2      | 1.814 | 1.641 | 2.369 | 2.147 | 2.155 | 2.147 | 2.180 | 2.157 | -     | 1.800 | -     | 1.141 | 133.9 | 169.2 | -     | 178.2 | 175.7 | 176.7  |
| <sup>4</sup> III <sub>b-hs</sub> -P        | 1.680 | -     | 2.417 | 2.134 | 2.157 | 2.134 | 2.157 | 2.145 | -     | -     | -     | -     | -     | 2.417 | -     | -     | 175.1 | 175.1  |
| <sup>2</sup> III <sub>b-ls</sub> -P        | 1.637 | -     | 2.370 | 2.143 | 2.154 | 2.143 | 2.153 | 2.148 | -     | -     | -     | -     | -     | 2.370 | -     | -     | 175.6 | 175.5  |
| [Fe(14-TMC)O <sub>2</sub> Cl] <sup>+</sup> |       |       |       |       |       |       |       |       |       |       |       |       |       |       |       |       |       |        |
| <sup>7</sup> IV <sub>b-hs</sub>            | 2.116 | 1.327 | 2.371 | 2.215 | 2.223 | 2.224 | 2.226 | 2.222 | -     | -     | -     | -     | 148.1 | 175.6 | -     | -     | 167.6 | 167.9  |
| <sup>5</sup> IV <sub>b-hs</sub>            | 1.950 | 1.348 | 2.355 | 2.221 | 2.239 | 2.213 | 2.237 | 2.227 | -     | -     | -     | -     | 145.3 | 176.0 | -     | -     | 170.7 | 170.2  |
| <sup>5</sup> IV <sub>b-is</sub>            | 2.172 | 1.364 | 2.444 | 2.149 | 2.135 | 2.152 | 2.124 | 2.140 | -     | -     | -     | -     | 134.9 | 173.6 | -     | -     | 171.3 | 170.8  |
| <sup>3</sup> IV <sub>b-is</sub>            | 2.160 | 1.304 | 2.386 | 2.232 | 2.181 | 2.242 | 2.215 | 2.217 | -     | -     | -     | -     | 132.6 | 173.0 | -     | -     | 169.8 | 170.6  |
| <sup>3</sup> IV <sub>b-ls</sub>            | 1.976 | 1.363 | 2.339 | 2.115 | 2.130 | 2.136 | 2.103 | 2.121 | -     | -     | -     | -     | 129.5 | 171.3 | -     | -     | 174.6 | 174.1  |
| <sup>1</sup> IV <sub>b-ls</sub>            | 1.929 | 1.355 | 2.346 | 2.112 | 2.138 | 2.136 | 2.106 | 2.123 | -     | -     | -     | -     | 130.8 | 171.7 | -     | -     | 174.7 | 174.9  |
| <sup>7</sup> IV <sub>b-hs</sub> -ts1       | 1.942 | 1.417 | 2.395 | 2.224 | 2.209 | 2.241 | 2.252 | 2.231 | 1.341 | -     | 1.258 | -     | 142.3 | 175.9 | 178.9 | -     | 171.8 | 171.8  |
| <sup>5</sup> IV <sub>b-hs</sub> -ts1       | 1.916 | 1.420 | 2.391 | 2.252 | 2.224 | 2.210 | 2.235 | 2.230 | 1.334 | -     | 1.259 | -     | 141.1 | 175.5 | 177.7 | -     | 172.3 | 172.1  |

|                                            |       |       |       |       |       |       |       |       |       |       |       |       |       |       |       |       |       |       |
|--------------------------------------------|-------|-------|-------|-------|-------|-------|-------|-------|-------|-------|-------|-------|-------|-------|-------|-------|-------|-------|
| <sup>5</sup> IV <sub>b-is</sub> -ts1       | 1.947 | 1.420 | 2.365 | 2.263 | 2.207 | 2.218 | 2.190 | 2.219 | 1.358 | -     | 1.251 | -     | 128.9 | 170.5 | 168.6 | -     | 173.7 | 173.4 |
| <sup>3</sup> IV <sub>b-is</sub> -ts1       | 1.961 | 1.412 | 2.377 | 2.257 | 2.213 | 2.225 | 2.195 | 2.222 | 1.295 | -     | 1.306 | -     | 130.5 | 169.9 | 167.0 | -     | 173.5 | 173.8 |
| <sup>3</sup> IV <sub>b-is</sub> -ts1       | 1.871 | 1.447 | 2.351 | 2.110 | 2.150 | 2.137 | 2.103 | 2.125 | 1.370 | -     | 1.232 | -     | 129.0 | 172.2 | 167.0 | -     | 175.7 | 175.3 |
| <sup>1</sup> IV <sub>b-is</sub> -ts1       | 1.867 | 1.447 | 2.354 | 2.105 | 2.111 | 2.139 | 2.146 | 2.125 | 1.337 | -     | 1.257 | -     | 129.3 | 171.2 | 170.5 | -     | 175.9 | 175.7 |
| <sup>7</sup> IV <sub>b-hs</sub> -Int       | 1.953 | 1.495 | 2.378 | 2.209 | 2.229 | 2.247 | 2.231 | 2.229 | -     | -     | -     | -     | 134.8 | 173.5 | -     | -     | 173.0 | 172.4 |
| <sup>5</sup> IV <sub>b-is</sub> -Int       | 2.021 | 1.514 | 2.457 | 2.124 | 2.166 | 2.151 | 2.156 | 2.149 | -     | -     | -     | -     | 130.6 | 130.6 | -     | -     | 174.5 | 174.3 |
| <sup>3</sup> IV <sub>b-is</sub> -Int       | 1.858 | 1.522 | 2.344 | 2.137 | 2.157 | 2.106 | 2.108 | 2.127 | -     | -     | -     | -     | 126.5 | 171.4 | -     | -     | 176.4 | 175.9 |
| <sup>7</sup> IV <sub>b-hs</sub> -ts2       | 1.927 | 1.724 | 2.403 | 2.209 | 2.229 | 2.260 | 2.237 | 2.233 | -     | 1.604 | -     | 1.180 | 134.4 | 172.9 | -     | 174.7 | 173.6 | 172.6 |
| <sup>5</sup> IV <sub>b-is</sub> -ts2       | 1.802 | 1.716 | 2.369 | 2.100 | 2.109 | 2.160 | 2.142 | 2.128 | -     | 1.699 | -     | 1.159 | 130.7 | 172.0 | -     | 170.8 | 175.7 | 176.2 |
| <sup>3</sup> IV <sub>b-is</sub> -ts2       | 1.802 | 1.716 | 2.369 | 2.100 | 2.109 | 2.160 | 2.142 | 2.128 | -     | 1.699 | -     | 1.158 | 130.7 | 172.0 | -     | 170.7 | 176.2 | 175.7 |
| <sup>5</sup> IV <sub>b-hs</sub> -P         | 1.659 | -     | 2.327 | 2.202 | 2.202 | 2.238 | 2.237 | 2.219 | -     | -     | -     | -     | -     | 177.5 | -     | -     | 173.4 | 173.4 |
| <sup>3</sup> IV <sub>b-is</sub> -P         | 1.657 | -     | 2.362 | 2.195 | 2.235 | 2.207 | 2.242 | 2.219 | -     | -     | -     | -     | -     | 178.1 | -     | -     | 175.4 | 175.4 |
| <sup>1</sup> IV <sub>b-is</sub> -P         | 1.669 | -     | 2.347 | 2.119 | 2.128 | 2.119 | 2.128 | 2.123 | -     | -     | -     | -     | -     | 176.9 | -     | -     | 175.3 | 175.3 |
| Exp. <sup>6</sup>                          | 1.646 | -     | -     | 2.067 | 2.069 | 2.109 | 2.117 | -     | -     | -     | -     | -     | -     | -     | -     | -     | -     | -     |
| [Co(14-TMC)O <sub>2</sub> Cl] <sup>+</sup> |       |       |       |       |       |       |       |       |       |       |       |       |       |       |       |       |       |       |
| <sup>2</sup> V <sub>b-is</sub>             | 1.959 | 1.351 | 2.348 | 2.116 | 2.114 | 2.116 | 2.086 | 2.116 | -     | -     | -     | -     | 129.4 | 171.6 | -     | -     | 174.9 | 175.1 |
| <sup>2</sup> V <sub>b-is</sub> -ts1        | 1.939 | 1.443 | 2.359 | 2.089 | 2.112 | 2.127 | 2.083 | 2.103 | 1.310 | -     | 1.296 | -     | 127.7 | 170.4 | 172.5 | -     | 175.4 | 175.7 |
| <sup>6</sup> V <sub>b-hs</sub> -Int        | 1.984 | 1.472 | 2.415 | 2.180 | 2.221 | 2.216 | 2.209 | 2.206 | -     | -     | -     | -     | 132.1 | 171.4 | -     | -     | 174.0 | 173.3 |
| <sup>4</sup> V <sub>b-is</sub> -Int        | 1.917 | 1.511 | 2.384 | 2.063 | 2.243 | 2.117 | 2.235 | 2.164 | -     | -     | -     | -     | 128.6 | 172.0 | -     | -     | 175.6 | 175.2 |
| <sup>2</sup> V <sub>b-is</sub> -Int        | 1.934 | 1.525 | 2.342 | 2.080 | 2.133 | 2.114 | 2.073 | 2.100 | -     | -     | -     | -     | 123.9 | 171.2 | -     | -     | 176.2 | 175.7 |
| <sup>6</sup> V <sub>b-hs</sub> -ts2        | 1.949 | 1.670 | 2.392 | 2.193 | 2.209 | 2.223 | 2.239 | 2.216 | -     | 1.706 | -     | 1.157 | 133.4 | 171.2 | -     | -     | 173.4 | 173.2 |
| <sup>2</sup> V <sub>b-is</sub> -ts2        | 1.926 | 1.736 | 2.375 | 2.073 | 2.083 | 2.001 | 2.044 | 2.050 | -     | 1.612 | -     | 1.176 | 130.1 | 172.4 | -     | 175.5 | 167.0 | 172.9 |
| <sup>6</sup> V <sub>b-hs</sub> -P          | 1.872 | -     | 2.374 | 2.221 | 2.225 | 2.221 | 2.226 | 2.223 | -     | -     | -     | -     | -     | 174.4 | -     | -     | 170.9 | 170.9 |
| <sup>4</sup> V <sub>b-is</sub> -P          | 1.647 | -     | 2.284 | 2.199 | 2.221 | 2.199 | 2.221 | 2.210 | -     | -     | -     | -     | -     | 177.5 | -     | -     | 173.9 | 173.8 |
| <sup>2</sup> V <sub>b-is</sub> -P          | 1.835 | -     | 2.353 | 2.090 | 2.098 | 2.090 | 2.099 | 2.094 | -     | -     | -     | -     | -     | 177.4 | -     | -     | 173.7 | 173.7 |

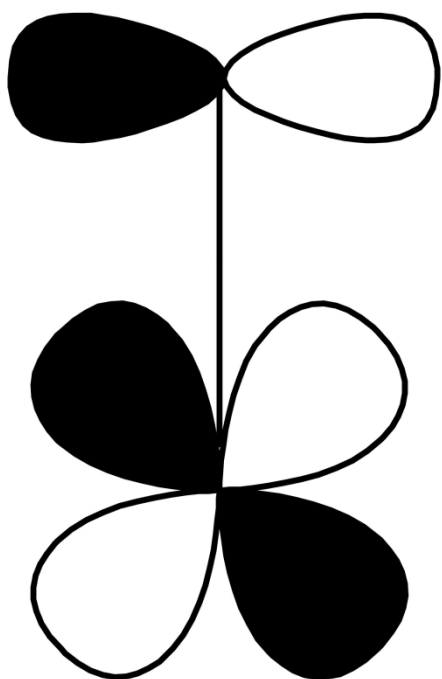

**Scheme S2.** Orbital picture of vanadium-superoxo species.

**Table S5.** B3LYP-D2 computed spin density values of metal-superoxo species, intermediates, transition states and product with 13-TMC.

| Spin State                                 | M      | O1     | O2     | C1     | C2     |
|--------------------------------------------|--------|--------|--------|--------|--------|
| [V(13-TMC)O <sub>2</sub> Cl] <sup>+</sup>  |        |        |        |        |        |
| <sup>4</sup> I <sub>a</sub> -hs            | 2.143  | 0.236  | 0.699  | -      | -      |
| <sup>2</sup> I <sub>a</sub> -hs            | 1.960  | -0.397 | -0.451 | -      | -      |
| <sup>4</sup> I <sub>a</sub> -hs-ts1        | 2.150  | -0.011 | 0.477  | 0.264  | -      |
| <sup>2</sup> I <sub>a</sub> -hs-ts1        | 2.162  | -0.153 | -0.380 | -0.283 | -      |
| <sup>4</sup> I <sub>a</sub> -hs-Int        | 2.121  | -0.091 | 0.076  | -      | -      |
| <sup>2</sup> I <sub>a</sub> ls-Int         | 0      | 0      | 0      | -      | -      |
| <sup>4</sup> I <sub>a</sub> -hs-ts2        | 1.985  | 0.218  | 0.348  | -      | 0.049  |
| <sup>2</sup> I <sub>a</sub> -P             | 1.267  | -0.195 | -      | -      | -      |
| [Cr(13-TMC)O <sub>2</sub> Cl] <sup>+</sup> |        |        |        |        |        |
| <sup>5</sup> II <sub>a</sub> -hs           | 3.219  | 0.317  | 0.643  | -      | -      |
| <sup>3</sup> II <sub>a</sub> -hs           | 3.221  | -0.397 | -0.627 | -      | -      |
| <sup>3</sup> II <sub>a</sub> -ls           | 1.161  | 0.308  | 0.606  | -      | -      |
| <sup>1</sup> II <sub>a</sub> -ls           | 1.117  | -0.383 | -0.648 | -      | -      |
| <sup>5</sup> II <sub>a</sub> -hs-ts1       | 3.170  | 0.079  | 0.431  | 0.301  | -      |
| <sup>3</sup> II <sub>a</sub> -hs-ts1       | 3.173  | -0.106 | -0.34  | -0.327 | -      |
| <sup>3</sup> II <sub>a</sub> -ls-ts1       | 1.169  | -0.017 | 0.383  | 0.319  | -      |
| <sup>1</sup> II <sub>a</sub> -ls-ts1       | -1.116 | 0.102  | 0.403  | 0.297  | -      |
| <sup>5</sup> II <sub>a</sub> -hs-Int       | 1.137  | -0.067 | 0.0136 | -      | -      |
| <sup>3</sup> II <sub>a</sub> -ls-Int       | 1.137  | -0.067 | 0.013  | -      | -      |
| <sup>5</sup> II <sub>a</sub> -hs-ts2       | 3.149  | 0.376  | 0.001  | -      | -0.118 |
| <sup>3</sup> II <sub>a</sub> -ls-ts2       | 1.195  | 0.219  | -0.107 | -      | 0.115  |
| <sup>3</sup> II <sub>a</sub> -hs-P         | 2.761  | -0.566 | -      | -      | -      |
| <sup>1</sup> II <sub>a</sub> -ls-P         | 0      | 0      | -      | -      | -      |
| [Mn(13-TMC)O <sub>2</sub> Cl] <sup>+</sup> |        |        |        |        |        |
| <sup>6</sup> III <sub>a</sub> -hs          | 4.102  | 0.467  | 0.637  | -      | -      |
| <sup>4</sup> III <sub>a</sub> -hs          | 4.336  | -0.621 | -0.765 | -      | -      |
| <sup>4</sup> III <sub>a</sub> -is          | 2.165  | 0.353  | 0.613  | -      | -      |
| <sup>2</sup> III <sub>a</sub> -is          | -0.006 | 0.353  | 0.641  | -      | -      |
| <sup>2</sup> III <sub>a</sub> -ls          | -0.007 | 0.353  | 0.641  | -      | -      |
| <sup>6</sup> III <sub>a</sub> -hs-ts1      | 4.100  | -0.030 | 0.371  | 0.282  | -      |
| <sup>4</sup> III <sub>a</sub> -hs-ts1      | 4.149  | -0.244 | -0.384 | -0.324 | -      |
| <sup>4</sup> III <sub>a</sub> -is-ts1      | 2.087  | 0.1066 | 0.435  | 0.288  | -      |
| <sup>2</sup> III <sub>a</sub> -is-ts1      | 2.092  | -0.064 | -0.349 | -0.316 | -      |
| <sup>2</sup> III <sub>a</sub> -ls-ts1      | 0.086  | 0.003  | 0.392  | 0.306  | -      |
| <sup>6</sup> III <sub>a</sub> -hs-Int      | 3.998  | 0.083  | 0.027  | -      | -      |

|                                            |        |        |        |        |        |
|--------------------------------------------|--------|--------|--------|--------|--------|
| $^4\text{III}_{\text{a-is}}\text{-Int}$    | 2.093  | 0.038  | 0.017  | -      | -      |
| $^2\text{III}_{\text{a-ls}}\text{-Int}$    | 0      | -      | -      | -      | -      |
| $^4\text{III}_{\text{a-is}}\text{-ts2}$    | 2.194  | 0.329  | -0.160 | -      | -0.112 |
| $^2\text{III}_{\text{a-ls}}\text{-ts2}$    | 0.037  | 0.297  | -0.079 | -      | -0.113 |
| $^4\text{III}_{\text{a-hs}}\text{-P}$      | 2.625  | 0.555  | -      | -      | -      |
| $^2\text{III}_{\text{a-ls}}\text{-P}$      | 1.083  | 0.012  | -      | -      | -      |
| [Fe(13-TMC)O <sub>2</sub> Cl] <sup>+</sup> |        |        |        |        |        |
| $^7\text{IV}_{\text{a-hs}}$                | 3.903  | 0.687  | 0.810  | -      | -      |
| $^5\text{IV}_{\text{a-hs}}$                | 3.938  | -0.106 | -0.512 | -      | -      |
| $^5\text{IV}_{\text{a-is}}$                | 2.861  | 0.542  | 0.687  | -      | -      |
| $^3\text{IV}_{\text{a-is}}$                | 3.448  | -0.705 | -0.842 | -      | -      |
| $^3\text{IV}_{\text{a-ls}}$                | 1.179  | 0.329  | 0.628  | -      | -      |
| $^1\text{IV}_{\text{a-ls}}$                | 1.233  | -0.402 | -0.664 | -      | -      |
| $^7\text{IV}_{\text{a-hs}}\text{-ts1}$     | 3.923  | 0.429  | 0.502  | 0.301  | -      |
| $^5\text{IV}_{\text{a-hs}}\text{-ts1}$     | 3.932  | 0.232  | -0.251 | -0.300 | -      |
| $^5\text{IV}_{\text{a-is}}\text{-ts1}$     | 3.115  | -0.040 | 0.315  | 0.275  | -      |
| $^3\text{IV}_{\text{a-is}}\text{-ts1}$     | 3.198  | -0.290 | -0.433 | -0.331 | -      |
| $^3\text{IV}_{\text{a-ls}}\text{-ts1}$     | 1.028  | 0.142  | 0.432  | 0.282  | -      |
| $^1\text{IV}_{\text{a-ls}}\text{-ts1}$     | 1.038  | -0.014 | -0.389 | -0.302 | -      |
| $^7\text{IV}_{\text{a-hs}}\text{-Int}$     | 3.971  | 0.269  | 0.052  | -      | -      |
| $^5\text{IV}_{\text{a-is}}\text{-Int}$     | 2.835  | 0.180  | 0.023  | -      | -      |
| $^3\text{IV}_{\text{a-ls}}\text{-Int}$     | 1.038  | 0.078  | 0.001  | -      | -      |
| $^7\text{IV}_{\text{a-hs}}\text{-ts2}$     | 3.965  | 0.692  | 0.008  | -      | 0.084  |
| $^5\text{IV}_{\text{a-is}}\text{-ts2}$     | 3.851  | 0.102  | 0.025  | -      | -0.052 |
| $^3\text{IV}_{\text{a-ls}}\text{-ts2}$     | 1.045  | 0.408  | -0.086 | -      | 0.081  |
| $^5\text{IV}_{\text{a-hs}}\text{-P}$       | 3.052  | 0.638  | -      | -      | -      |
| $^3\text{IV}_{\text{a-is}}\text{-P}$       | 1.288  | 0.796  | -      | -      | -      |
| $^1\text{IV}_{\text{a-ls}}\text{-P}$       | 0      | 0      | -      | -      | -      |
| [Co(13-TMC)O <sub>2</sub> Cl] <sup>+</sup> |        |        |        |        |        |
| $^2\text{V}_{\text{a-ls}}$                 | -0.127 | 0.449  | 0.638  | -      | -      |
| $^2\text{V}_{\text{a-ls}}\text{-ts1}$      | -0.011 | 0.119  | 0.349  | 0.332  | -      |
| $^6\text{V}_{\text{a-hs}}\text{-Int}$      | 1.775  | 0.196  | 0.014  | -      | -      |
| $^2\text{V}_{\text{a-ls}}\text{-Int}$      | 0      | 0      | -      | -      | -      |
| $^6\text{V}_{\text{a-hs}}\text{-ts2}$      | 2.736  | 0.856  | 0.061  | -      | -0.115 |
| $^2\text{V}_{\text{a-ls}}\text{-ts2}$      | 0.059  | 0.364  | -0.084 | -      | -0.122 |
| $^6\text{V}_{\text{a-hs}}\text{-P}$        | 2.734  | 1.396  | -      | -      | -      |
| $^4\text{V}_{\text{a-is}}\text{-P}$        | 1.831  | 0.900  | -      | -      | -      |
| $^2\text{V}_{\text{a-ls}}\text{-P}$        | -0.028 | 0.972  | -      | -      | -      |

**Table S6.** B3LYP-D2 computed spin density values of metal-superoxo species, intermediates, transition states and product with 14-TMC.

| Spin State                                 | M      | O1     | O2     | C1     | C2     |
|--------------------------------------------|--------|--------|--------|--------|--------|
| [V(14-TMC)O <sub>2</sub> Cl] <sup>+</sup>  |        |        |        |        |        |
| <sup>4</sup> I <sub>b-hs</sub>             | 2.166  | 0.203  | 0.722  | -      | -      |
| <sup>2</sup> I <sub>b-hs</sub>             | 2.014  | -0.406 | -0.478 | -      | -      |
| <sup>4</sup> I <sub>b-hs</sub> -ts1        | 2.168  | -0.020 | 0.484  | 0.256  | -      |
| <sup>2</sup> I <sub>b-hs</sub> -ts1        | 2.181  | -0.155 | -0.386 | -0.272 | -      |
| <sup>4</sup> I <sub>b-hs</sub> -Int        | 2.1371 | 0.079  | -0.096 | -      | -      |
| <sup>2</sup> I <sub>b-ls</sub> -Int        | 0      | 0      | 0      | -      | -      |
| <sup>4</sup> I <sub>b-hs</sub> -ts2        | 1.919  | 0.175  | 0.685  | -      | -0.029 |
| <sup>2</sup> I <sub>b-hs</sub> -P          | 1.288  | -2.004 | -      | -      | -      |
| [Cr(14-TMC)O <sub>2</sub> Cl] <sup>+</sup> |        |        |        |        |        |
| <sup>5</sup> II <sub>b-hs</sub>            | 3.248  | 0.307  | 0.650  | -      | -      |
| <sup>3</sup> II <sub>b-hs</sub>            | 3.246  | -0.390 | -0.632 | -      | -      |
| <sup>3</sup> II <sub>b-ls</sub>            | 1.185  | 0.299  | 0.607  | -      | -      |
| <sup>1</sup> II <sub>b-ls</sub>            | 1.132  | -0.375 | -0.650 | -      | -      |
| <sup>5</sup> II <sub>b-hs</sub> -ts1       | 3.192  | 0.079  | 0.432  | 0.295  | -      |
| <sup>3</sup> II <sub>b-hs</sub> -ts1       | 3.191  | -0.096 | -0.346 | -0.322 | -      |
| <sup>3</sup> II <sub>b-ls</sub> -ts1       | 0.945  | 0.155  | 0.429  | 0.291  | -      |
| <sup>1</sup> II <sub>b-ls</sub> -ts1       | -1.116 | 0.101  | 0.403  | 0.297  | -      |
| <sup>5</sup> II <sub>b-hs</sub> -Int       | 3.179  | -0.002 | 0.040  | -      | -      |
| <sup>3</sup> II <sub>b-ls</sub> -Int       | 1.126  | -0.044 | 0.007  | -      | -      |
| <sup>5</sup> II <sub>b-hs</sub> -ts2       | 3.159  | 0.384  | 0.014  | -      | -0.118 |
| <sup>3</sup> II <sub>b-ls</sub> -ts2       | 3.099  | -0.266 | 0.099  | -      | 0.126  |
| <sup>3</sup> II <sub>b-hs</sub> -P         | 2.784  | -0.569 | -      | -      | -      |
| <sup>1</sup> II <sub>b-ls</sub> -P         | 0      | 0      | -      | -      | -      |
| [Mn(14-TMC)O <sub>2</sub> Cl] <sup>+</sup> |        |        |        |        |        |
| <sup>6</sup> III <sub>b-hs</sub>           | 4.202  | 0.287  | 0.563  | -      | -      |
| <sup>4</sup> III <sub>b-hs</sub>           | 4.344  | -0.604 | -0.776 | -      | -      |
| <sup>4</sup> III <sub>b-is</sub>           | 2.176  | 0.331  | 0.640  | -      | -      |
| <sup>2</sup> III <sub>b-is</sub>           | 2.186  | -0.639 | -0.377 | -      | -      |
| <sup>2</sup> III <sub>b-ls</sub>           | -0.012 | 0.350  | 0.647  | -      | -      |
| <sup>6</sup> III <sub>b-hs</sub> -ts1      | 4.144  | -0.044 | 0.359  | 0.266  | -      |
| <sup>4</sup> III <sub>b-hs</sub> -ts1      | 4.186  | -0.248 | -0.392 | -0.320 | -      |
| <sup>4</sup> III <sub>b-is</sub> -ts1      | 2.095  | 0.109  | 0.441  | 0.279  | -      |
| <sup>2</sup> III <sub>b-is</sub> -ts1      | 2.092  | -0.051 | -0.347 | -0.309 | -      |
| <sup>2</sup> III <sub>b-ls</sub> -ts1      | 0.101  | -0.014 | 0.395  | 0.299  | -      |
| <sup>6</sup> III <sub>b-hs</sub> -Int      | 3.987  | -0.010 | 0.042  | -      | -      |
| <sup>4</sup> III <sub>b-is</sub> -Int      | 2.098  | 0.042  | 0.023  | -      | -      |



|                                                   |        |        |        |        |        |
|---------------------------------------------------|--------|--------|--------|--------|--------|
| ${}^2\text{III}_{\text{b-ls}}\text{-Int}$         | 0      | 0      | 0      | -      | -      |
| ${}^4\text{III}_{\text{b-is}}\text{-ts2}$         | 3.898  | -0.214 | 0.049  | -      | 0.113  |
| ${}^2\text{III}_{\text{b-ls}}\text{-ts2}$         | 0.063  | 0.251  | -0.054 | -      | -0.109 |
| ${}^4\text{III}_{\text{b-hs}}\text{-P}$           | 2.677  | 0.545  | -      | -      | -      |
| ${}^2\text{III}_{\text{b-ls}}\text{-P}$           | 1.165  | -0.061 | -      | -      | -      |
| $[\text{Fe}(14\text{-TMC})\text{O}_2\text{Cl}]^+$ |        |        |        |        |        |
| ${}^7\text{IV}_{\text{b-hs}}$                     | 3.929  | 0.656  | 0.799  | -      | -      |
| ${}^5\text{IV}_{\text{b-hs}}$                     | 3.937  | -0.079 | -0.521 | -      | -      |
| ${}^5\text{IV}_{\text{b-is}}$                     | 2.861  | 0.542  | 0.687  | -      | -      |
| ${}^3\text{IV}_{\text{b-is}}$                     | 3.426  | -0.834 | -0.689 | -      | -      |
| ${}^3\text{IV}_{\text{b-ls}}$                     | 1.179  | 0.329  | 0.628  | -      | -      |
| ${}^1\text{IV}_{\text{b-ls}}$                     | 1.233  | -0.402 | -0.664 | -      | -      |
| ${}^7\text{IV}_{\text{b-hs}}\text{-ts1}$          | 3.930  | 0.432  | 0.504  | 0.292  | -      |
| ${}^5\text{IV}_{\text{b-hs}}\text{-ts1}$          | 3.938  | 0.247  | -0.253 | -0.294 | -      |
| ${}^5\text{IV}_{\text{b-is}}\text{-ts1}$          | 3.194  | -0.076 | 0.277  | 0.266  | -      |
| ${}^3\text{IV}_{\text{b-is}}\text{-ts1}$          | 3.262  | -0.307 | -0.447 | -0.327 | -      |
| ${}^3\text{IV}_{\text{b-ls}}\text{-ts1}$          | 1.031  | 0.150  | 0.437  | 0.269  | -      |
| ${}^1\text{IV}_{\text{b-ls}}\text{-ts1}$          | 1.036  | 0.003  | -0.391 | -0.295 | -      |
| ${}^7\text{IV}_{\text{b-hs}}\text{-Int}$          | 3.980  | 0.276  | 0.051  | -      | -      |
| ${}^5\text{IV}_{\text{b-is}}\text{-Int}$          | 2.896  | 0.194  | 0.030  | -      | -      |
| ${}^3\text{IV}_{\text{b-ls}}\text{-Int}$          | 1.039  | 0.089  | -0.000 | -      | -      |
| ${}^7\text{IV}_{\text{b-hs}}\text{-ts2}$          | 3.961  | 0.698  | 0.038  | -      | -0.118 |
| ${}^5\text{IV}_{\text{b-is}}\text{-ts2}$          | 1.049  | 0.419  | -0.080 | -      | -0.119 |
| ${}^3\text{IV}_{\text{b-ls}}\text{-ts2}$          | 1.049  | 0.419  | -0.080 | -      | -0.118 |
| ${}^5\text{IV}_{\text{b-hs}}\text{-P}$            | 3.081  | 0.632  | -      | -      | -      |
| ${}^3\text{IV}_{\text{b-is}}\text{-P}$            | 1.313  | 0.793  | -      | -      | -      |
| ${}^1\text{IV}_{\text{b-ls}}\text{-P}$            | 0      | 0      | -      | -      | -      |
| $[\text{Co}(14\text{-TMC})\text{O}_2\text{Cl}]^+$ |        |        |        |        |        |
| ${}^2\text{V}_{\text{b-ls}}$                      | -0.146 | 0.456  | 0.642  | -      | -      |
| ${}^2\text{V}_{\text{b-ls}}\text{-ts1}$           | 0.002  | 0.107  | 0.349  | -      | -      |
| ${}^6\text{V}_{\text{b-hs}}\text{-Int}$           | 2.776  | 0.437  | 0.083  | -      | -      |
| ${}^4\text{V}_{\text{b-is}}\text{-Int}$           | 1.829  | 0.173  | 0.013  | -      | -      |
| ${}^2\text{V}_{\text{b-ls}}\text{-Int}$           | 0      | 0      | 0      | -      | -      |
| ${}^6\text{V}_{\text{b-hs}}\text{-ts2}$           | 2.755  | 0.821  | 0.070  | -      | -0.114 |
| ${}^2\text{V}_{\text{b-ls}}\text{-ts2}$           | 0.061  | 0.368  | -0.077 | -      | -0.122 |
| ${}^6\text{V}_{\text{b-hs}}\text{-P}$             | 2.750  | 1.400  | -      | -      | -      |
| ${}^4\text{V}_{\text{b-is}}\text{-P}$             | 1.855  | 0.884  | -      | -      | -      |
| ${}^2\text{V}_{\text{b-ls}}\text{-P}$             | -0.026 | 0.974  | -      | -      | -      |

**Table S7.** B3LYP-D2 computed Mulliken charge at selected atoms with 13/14-TMC ring.

|                                            |                                            |
|--------------------------------------------|--------------------------------------------|
| O2 (at distal oxygen)                      | O2 (at distal oxygen)                      |
| [V(13-TMC)O <sub>2</sub> Cl] <sup>+</sup>  | [V(14-TMC)O <sub>2</sub> Cl] <sup>+</sup>  |
| -0.211                                     | -0.206                                     |
| [Cr(13-TMC)O <sub>2</sub> Cl] <sup>+</sup> | [Cr(14-TMC)O <sub>2</sub> Cl] <sup>+</sup> |
| -0.166                                     | -0.160                                     |
| [Mn(14-TMC)O <sub>2</sub> Cl] <sup>+</sup> | [Mn(14-TMC)O <sub>2</sub> Cl] <sup>+</sup> |
| -0.203                                     | -0.086                                     |
| [Fe(14-TMC)O <sub>2</sub> Cl] <sup>+</sup> | [Fe(14-TMC)O <sub>2</sub> Cl] <sup>+</sup> |
| -0.096                                     | -0.099                                     |
| [Co(14-TMC)O <sub>2</sub> Cl] <sup>+</sup> | [Co(14-TMC)O <sub>2</sub> Cl] <sup>+</sup> |
| -0.164                                     | -0.159                                     |

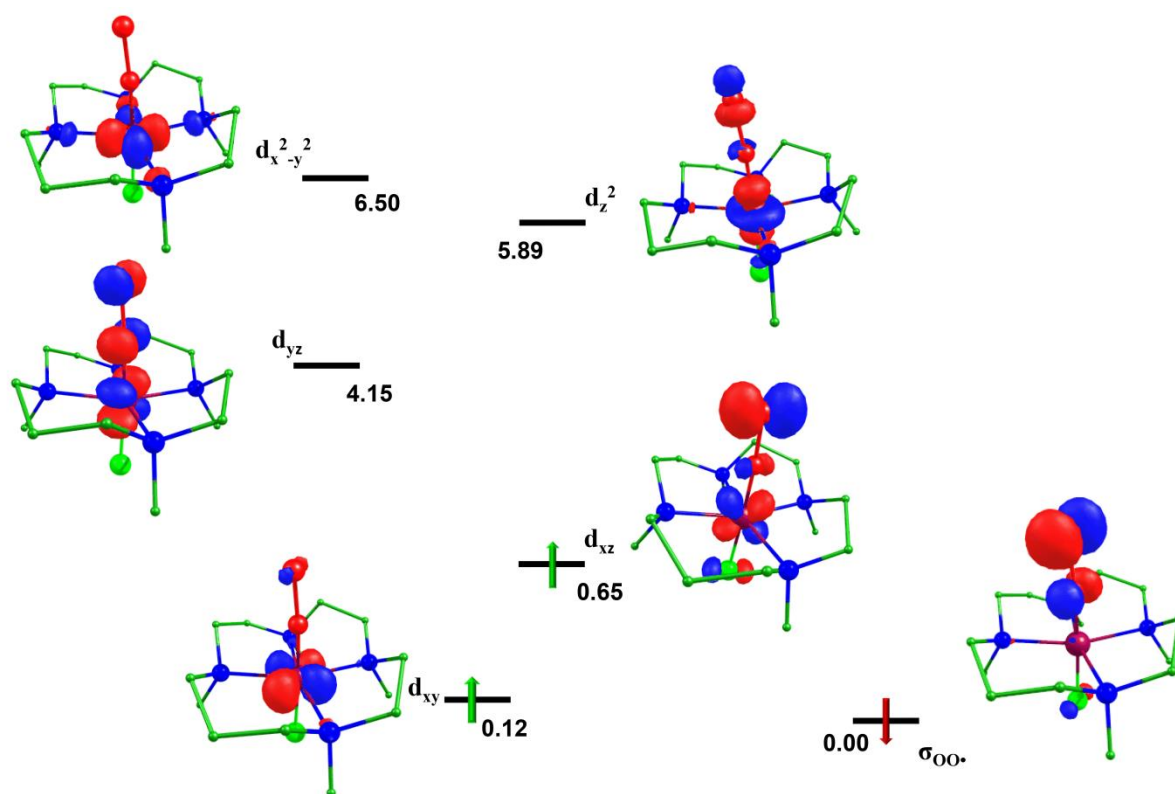

**Fig. S3** Computed eigenvalue plot incorporating energies computed for  $d$  based orbitals for alpha and beta spin corresponding to the ground state ( ${}^2I_{a-hs}$ ) of vanadium-superoxo species (energies are given in eV).

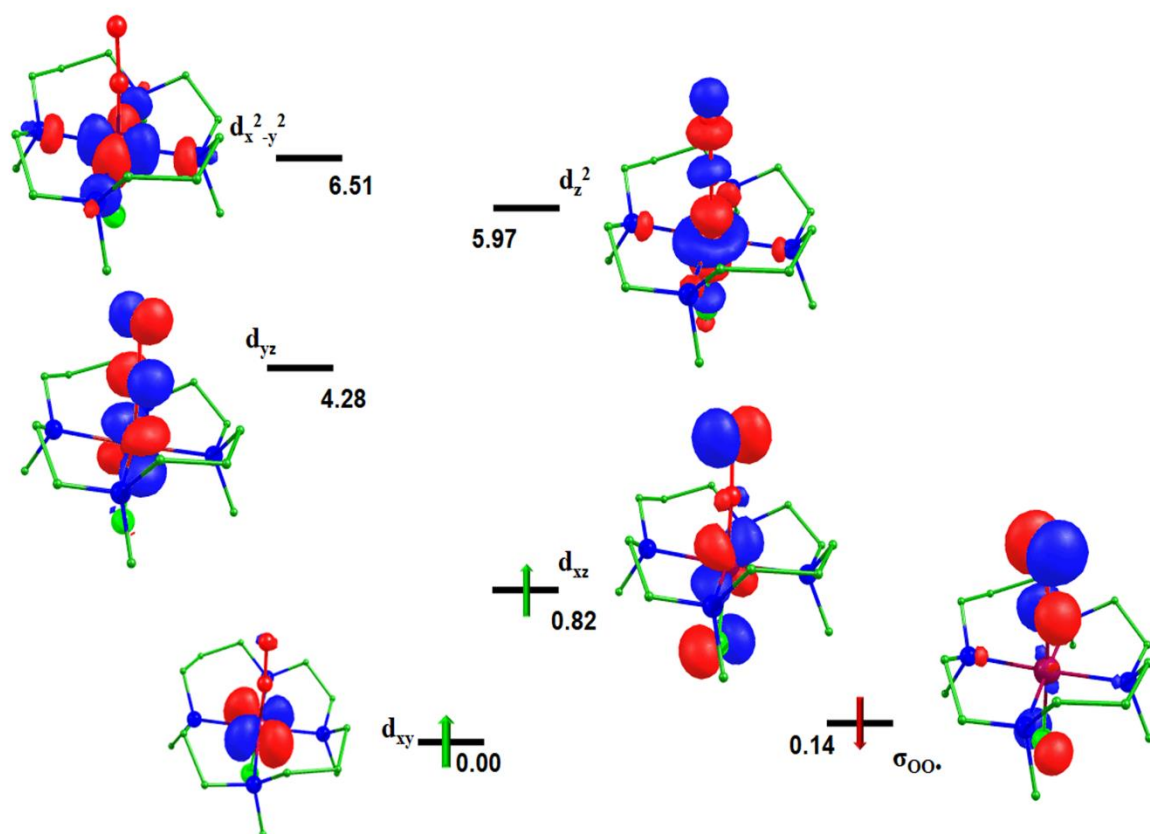

**Fig. S4** Computed eigenvalue plot incorporating energies computed for  $d$  based orbitals for alpha and beta spin corresponding to the ground state ( ${}^2I_{b-hs}$ ) of the vanadium-superoxo species (energies are given in eV).

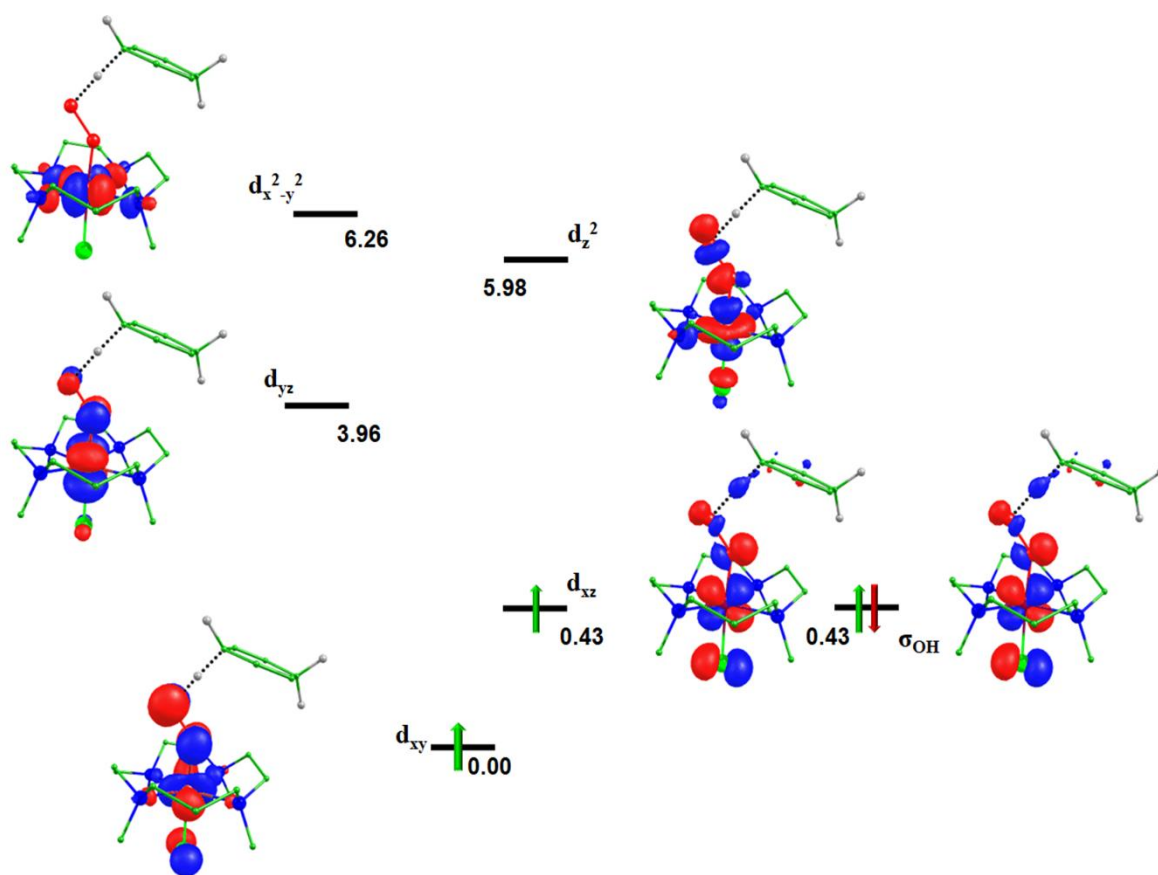

**Fig. S5** Computed eigenvalue plot incorporating energies computed for  $d$  based orbitals for alpha and beta spin corresponding to the ground state ( ${}^2\bar{1}_{a-hs-ts1}$ ) of vanadium-superoxo species (energies are given in eV).

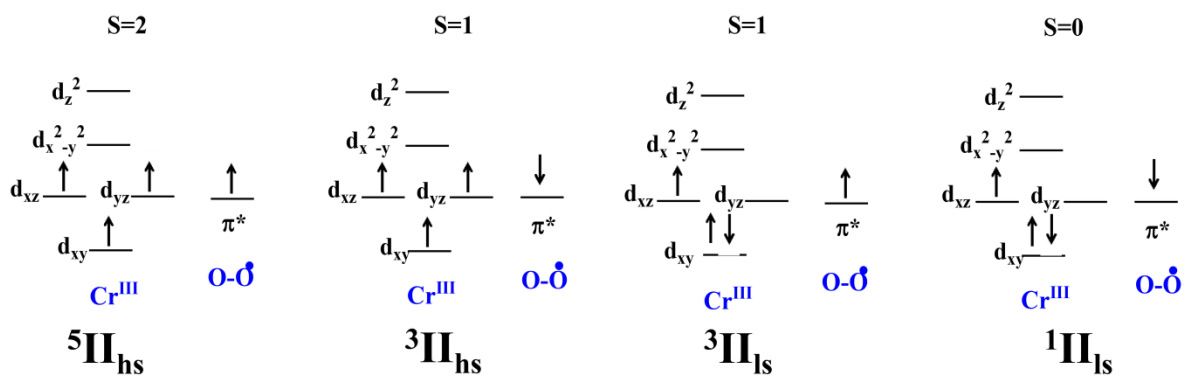

**Scheme S3.** A model structure of chromium-superoxo species with existence of quintet, triplet and singlet spin states.

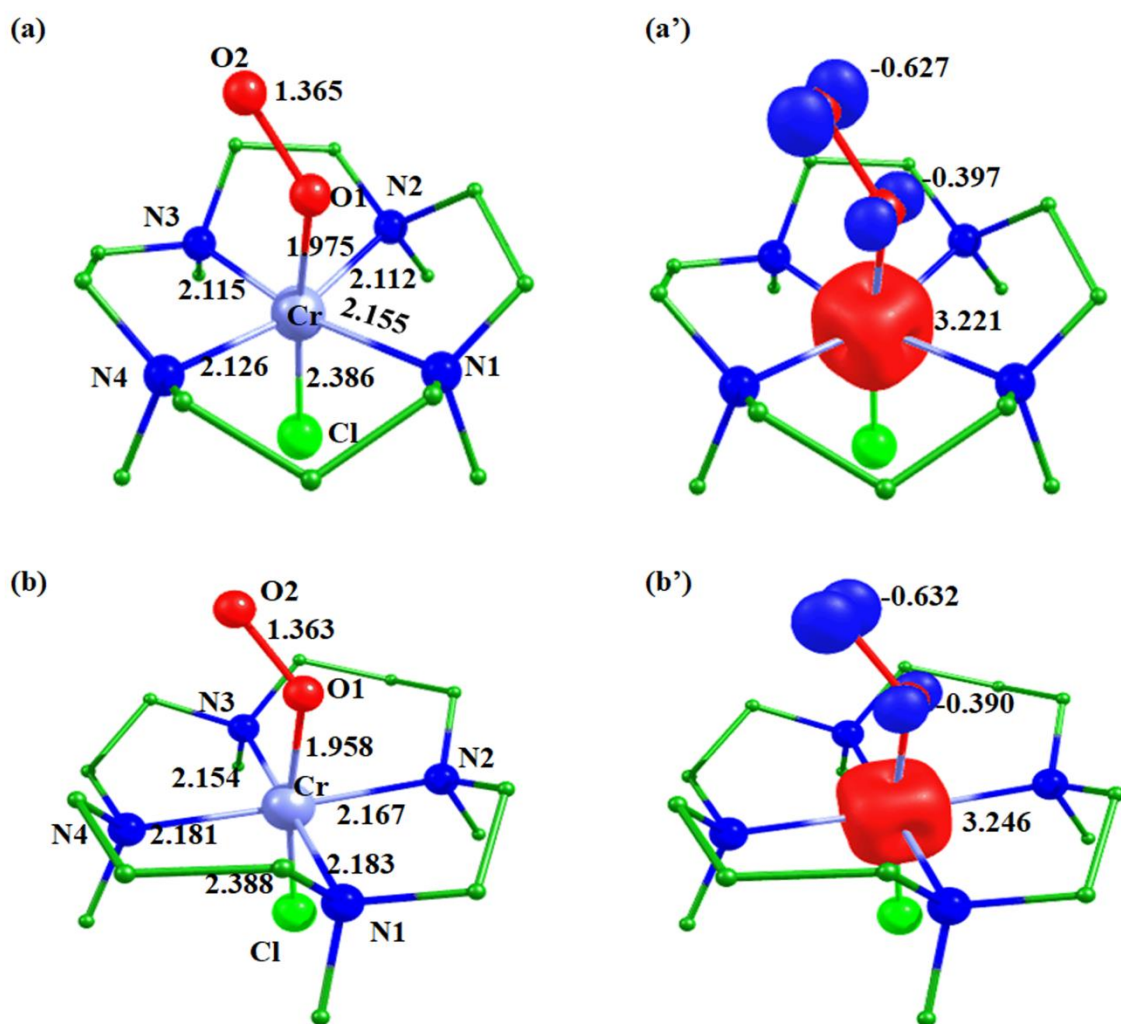

**Fig. S6** B3LYP-D2 a) optimized structure (bond lengths in Å), a') corresponding spin density plot of the ground state  ${}^2\Pi_{a-hs}$ , b) optimized structure (bond lengths in Å) and b') corresponding spin density plot of the ground state  ${}^2\Pi_{b-hs}$ .

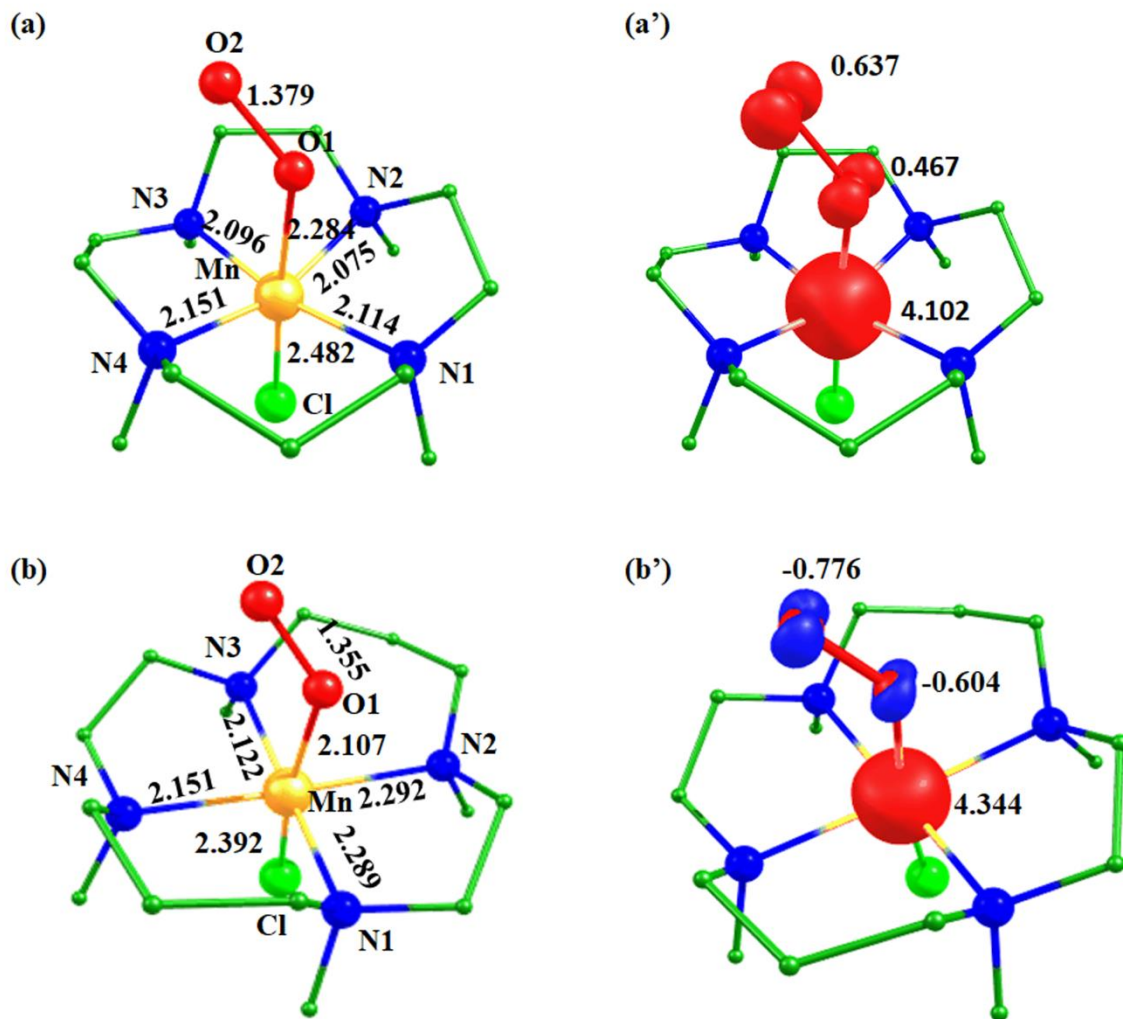

**Fig. S7** B3LYP-D2 a) optimized structure (bond lengths in Å), a') corresponding spin density plot of  ${}^6\text{III}_{a\text{-hs}}$ , b) optimized structure (bond lengths in Å) and b') corresponding spin density plot of  ${}^4\text{III}_{b\text{-hs}}$ .



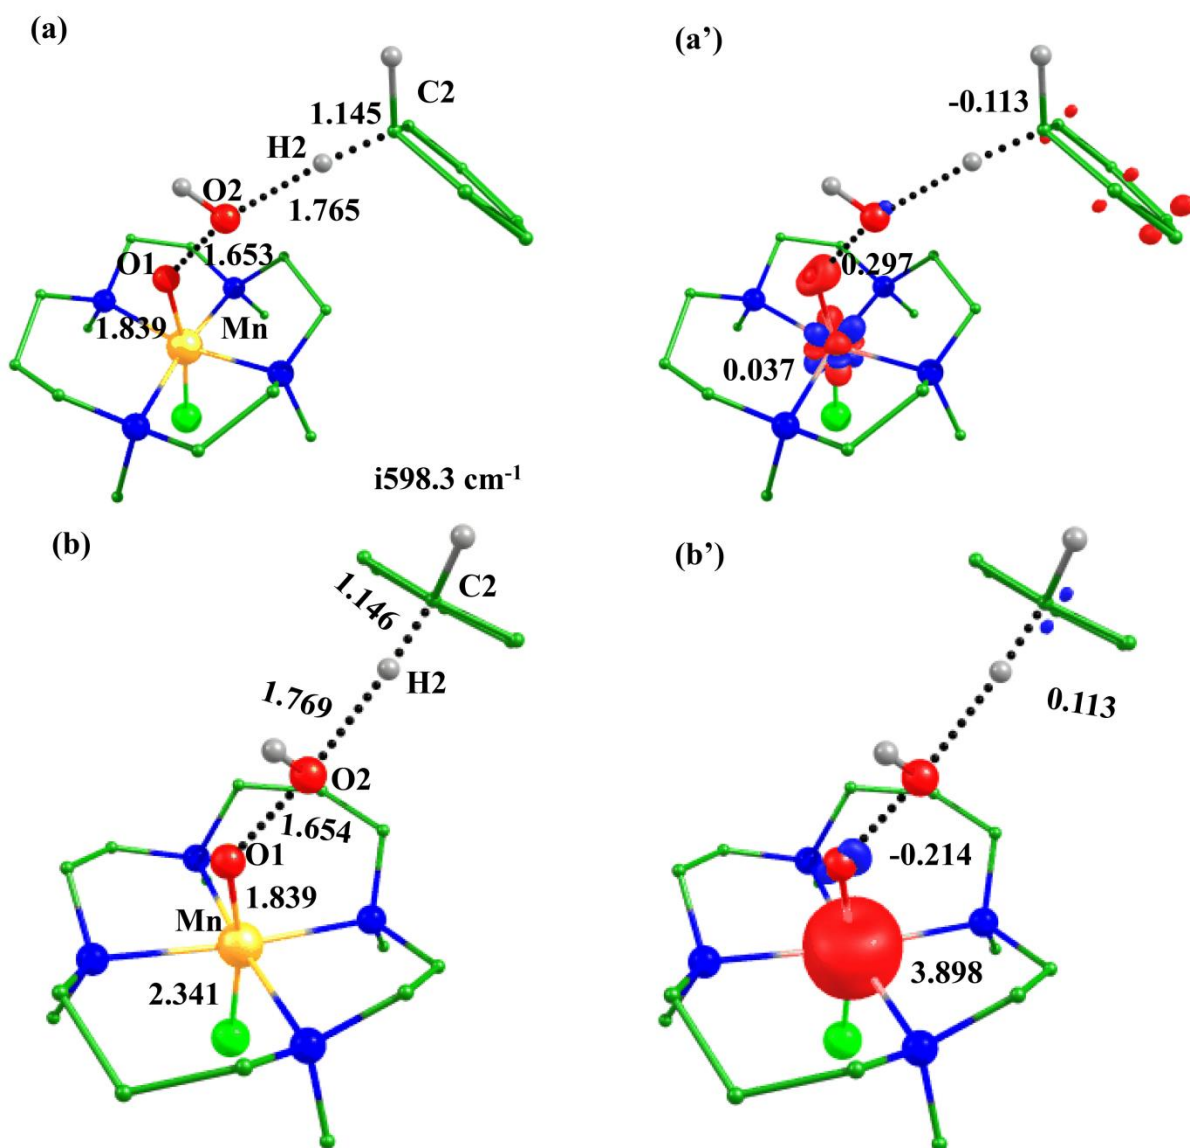

**Fig. S8** B3LYP-D2 a) optimized structure (bond lengths in Å), a') corresponding spin density plot of  ${}^4\Pi_{a-is}$ -ts2, b) optimized structure and b') corresponding spin density plot of  ${}^4\Pi_{b-is}$ -ts2.

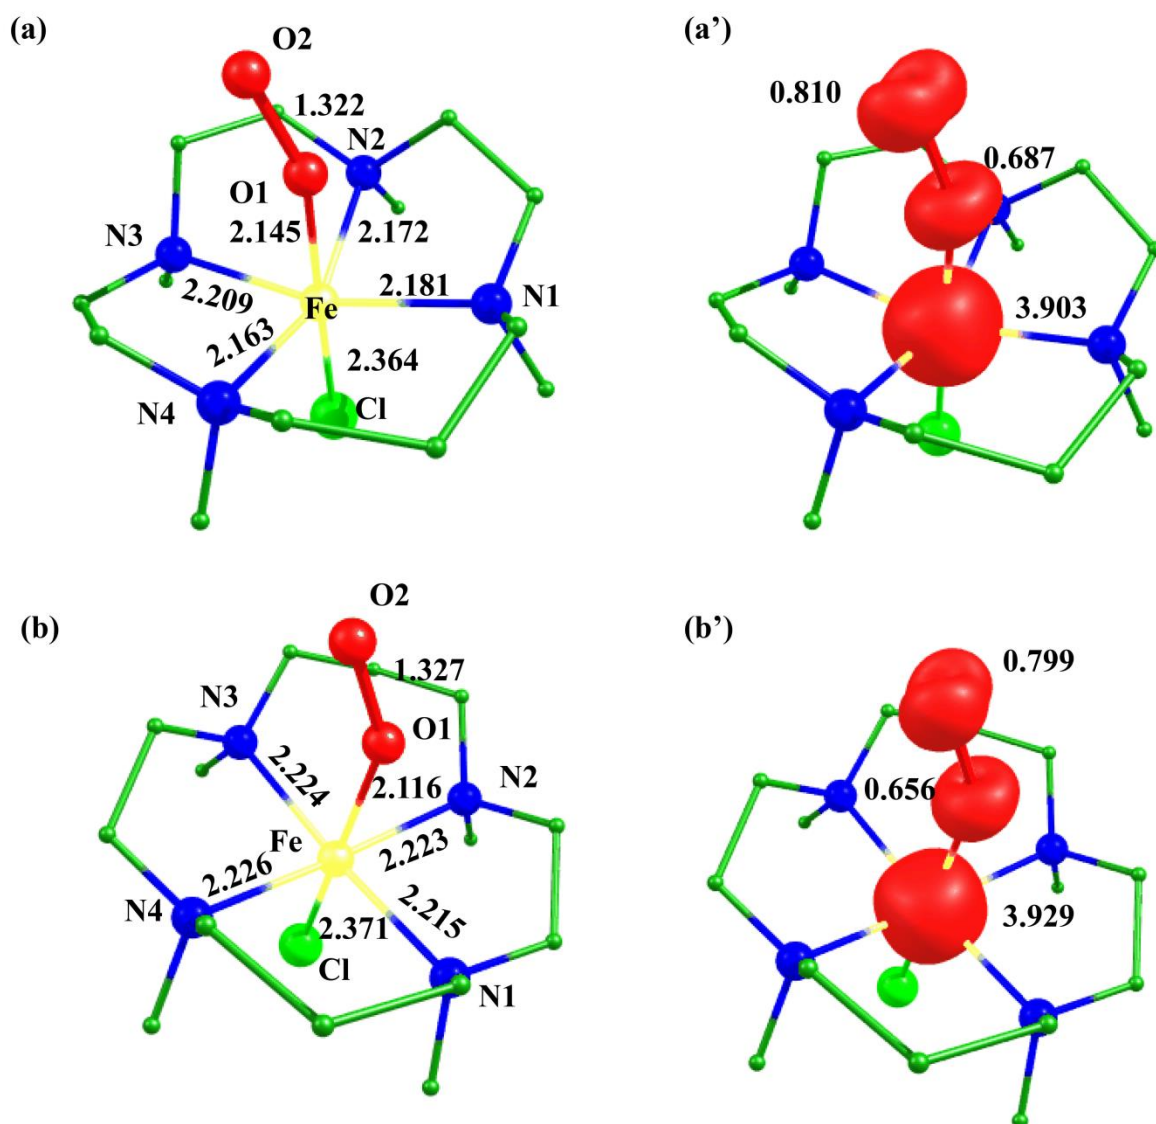

**Fig. S9** B3LYP-D2 a) optimized structure (bond lengths in Å), a') corresponding spin density plot of  ${}^7\text{IV}_{\text{a-hs}}$ , b) optimized structure (bond lengths in Å) and b') corresponding spin density plot of  ${}^7\text{IV}_{\text{b-hs}}$ .

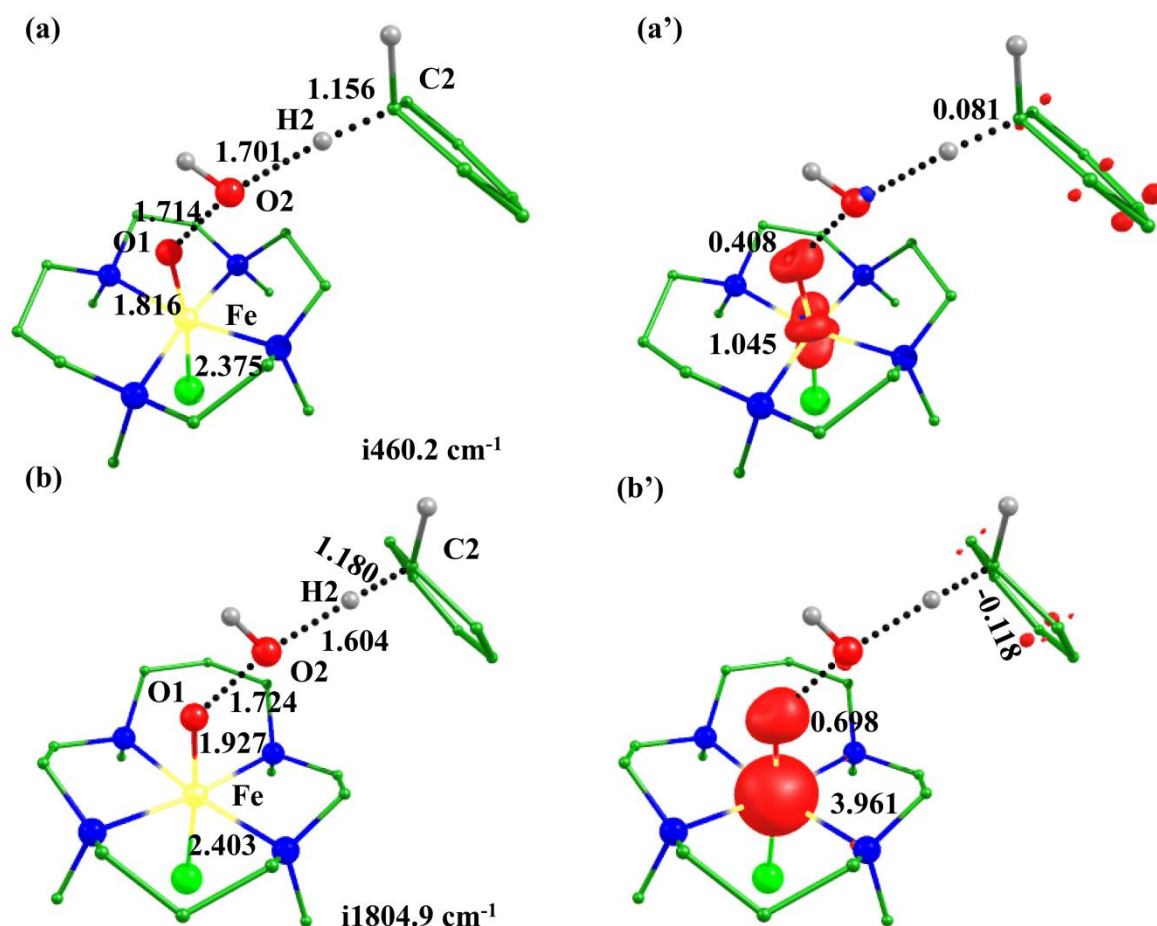

**Fig. S10** B3LYP-D2 a) optimized structure (bond lengths in Å), a') corresponding spin density plot of  $^3\text{IV}_{\text{a-ls-ts2}}$ , b) optimized structure (bond lengths in Å) and b') corresponding spin density plot of  $^7\text{IV}_{\text{b-hs-ts2}}$ .

Here, we have got optimized geometry only at low spin surface of species V and other surfaces could not get optimize due to convergence issue. So we have performed the single point calculation for the other spin surfaces using co-ordinates of optimized geometry of the low spin state. Our results show that low spin of species V is the ground state.

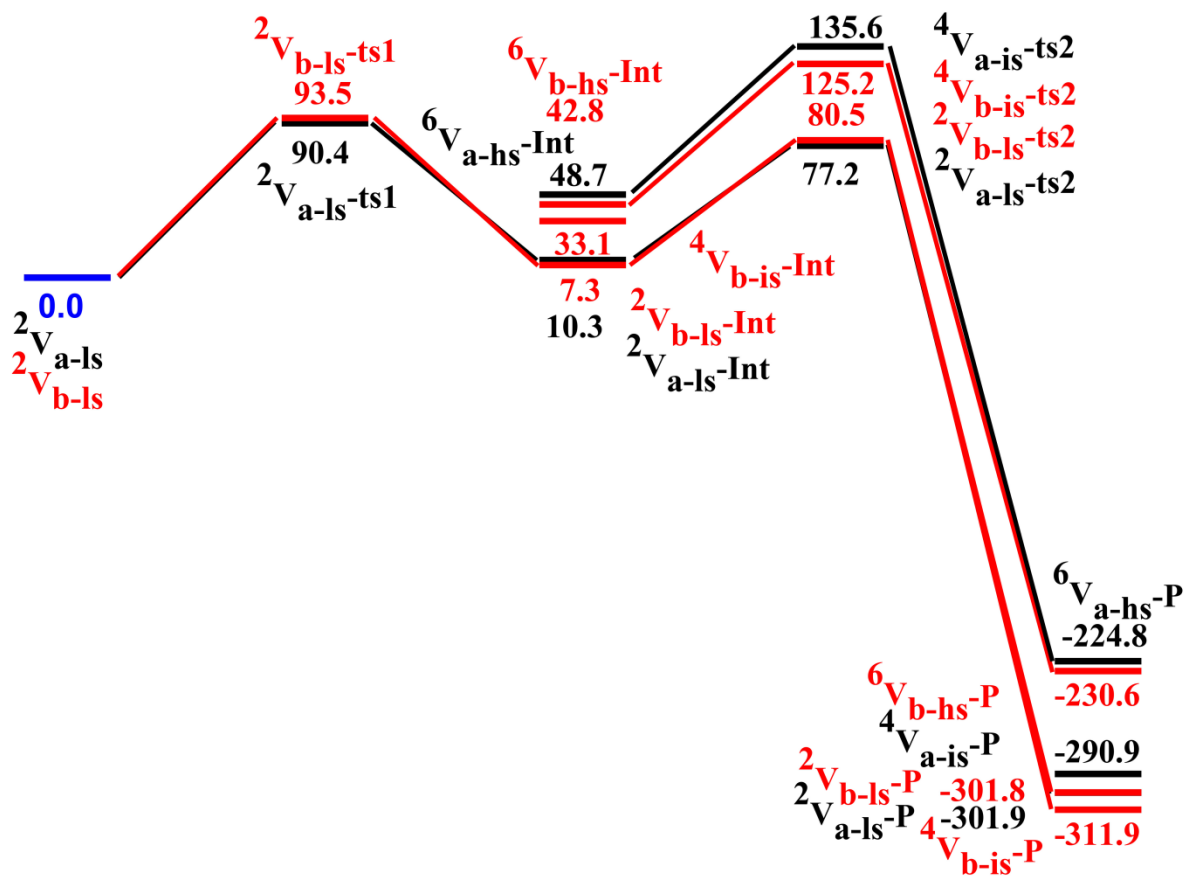

**Fig. S11** B3LYP-D2-computed energy surface ( $\Delta G$  in  $\text{kJmol}^{-1}$ ) for C-H activation by cobalt-superoxo species (13-TMC (black), 14-TMC (red)).

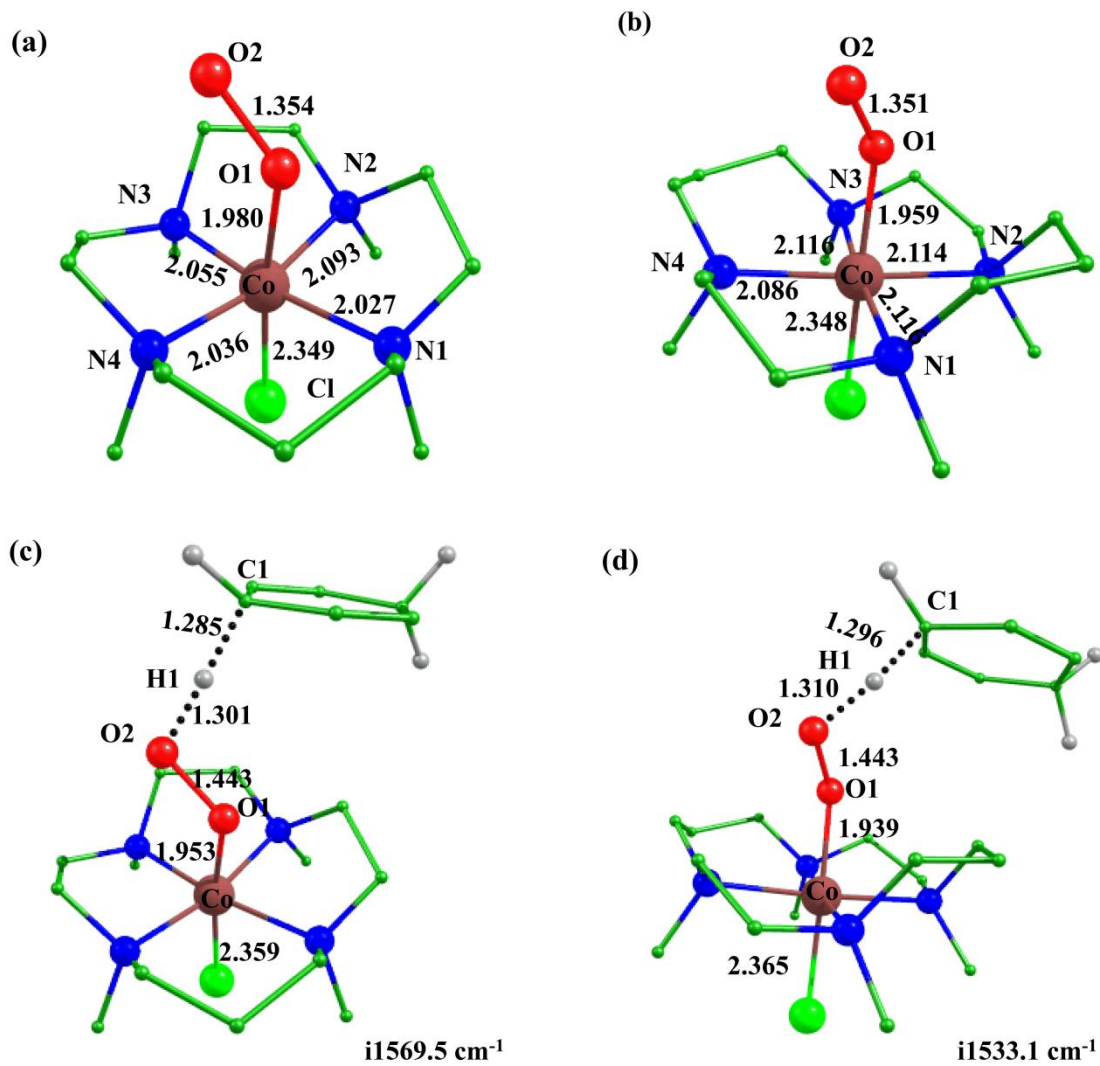

**Fig. S12** B3LYP-D2 a) optimized structure (bond lengths in Å) of  ${}^2V_{a-ls}$ , b) optimized structure (bond lengths in Å) of  ${}^2V_{b-ls}$ , B3LYP-D2 c) optimized structure (bond lengths in Å) of  ${}^2V_{a-ls-ts2}$ , d) optimized structure (bond lengths in Å) of  ${}^2V_{b-ls-ts2}$ .

## References

1. M. Q. E. Mubarak, S. P. de Visser, *Dalton Trans.*, 2019, **48**, 16899-16910.
2. J. B. Gordon, A. C. Vilbert, M. A. Siegler, K. M. Lancaster, P. Moenne-Loccoz, D. P. Goldberg, *J. Am. Chem. Soc.*, 2019, **141**, 3641-3653.
3. B. Wang, Y.-M. Lee, W.-Y. Tcho, S. Tussupbayev, S.-T. Kim, Y. Kim, M. S. Seo, K.-B. Cho, Y. Dede, B. C. Keegan, T. Ogura, S. H. Kim, T. Ohta, M.-H. Baik, K. Ray, J. Shearer, W. Nam, *Nat. Commun.*, 2017, **24**, 14839-14849.
4. J. Cho, J. Woo, W. Nam, *J. Am. Chem. Soc.*, 2010, **132**, 5958-5959.
5. J. Cho, J. Woo, W. Nam, *J. Am. Chem. Soc.*, 2012, **134**, 11112-11115.
6. J.-U. Rohde, J.-H. In, M. H. Lim, W. W. Brennessel, M. R. Bukowski, A. Stubna, E. Munck, W. Nam, L. Que, Jr., *Science*, 2003, **299**, 1037-1039.
